# Supplementary material for: A systems biology approach uncovers cell-specific gene regulatory effects of genetic associations in multiple sclerosis
Source: PubMed Central journal article supplement (PMC6527683; doi:10.1038/s41467-019-09773-y), 2019-05-20
Supplement: 41467_2019_9773_MOESM1_ESM.pdf [file 41467_2019_9773_MOESM1_ESM.pdf]

# Supplementary Information

A Systems Biology approach to determine cell-specific gene regulatory  
effects of genetic associations in multiple sclerosis

International Multiple Sclerosis Genetics Consortium\*

GWAS summary statistics

GWAS genotype-level individual data

## I. SNP to Gene

### Step 1a

1. Identify independently associated SNPs
2. Select SNPs in LD ( $r^2 > 0.8, 0.5$  or  $0.1$ )
3. Pull RegulomeDB full records for selected SNPs

### Step 1b

1. Aggregate RegulomeDB data into cell specific signals (T cells, monocytes, etc)
2. Aggregate RegulomeDB data into major regulatory signals (activation, repression, etc)

### Step 2

Compute predicted regulatory effect (PRE) for each gene within associated loci

Add all positive and negative regulatory effects for a given gene

Weight evidence by number of experiments in ENCODE and REP

### PRE Visualization

locus 123

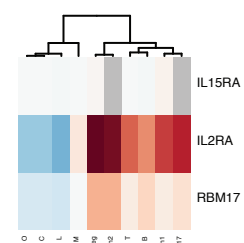

Genome-wide

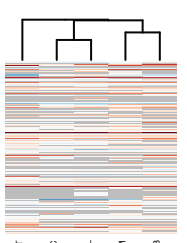

## II. Gene to Pathway

### Step 3

1. integrate cell-specific PRE with protein interaction network (PPI)
2. create cell-specific interactomes of MS-associated genes
3. compute significance of network by permutation

### cell-specific network Visualization (population level)

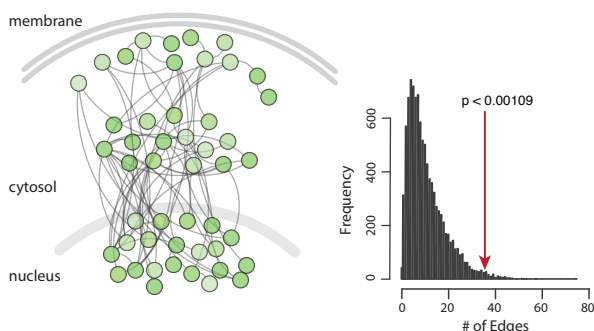

### individualized cell-specific MS-risk network

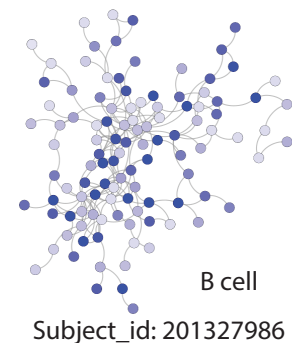

**Supplementary Figure 1. Overview of our approach.** Both summary statistics and genotype-level data were incorporated into the pipeline. The algorithm consists of two stages: I. SNP to Gene (steps 1 and 2) and II. Gene to pathway (step 3). Step 1 consists in selecting individual SNPs, and those in LD. Subsequently, RegulomeDB records for all selected SNPs are parsed and organized in discrete regulatory signals (activation, repression, etc) and discrete cell type (B cell, T cell, etc) where the regulatory effect has been documented. Step 2 consists in computing an aggregate score for each nearby gene from all regulatory signals. This predicted regulatory effect (PRE) is then used to prioritize each gene within a region and construct a local protein interactome based on an established protein interaction network. Finally, the resulting network is evaluated for statistical significance and visualized both at the population and individual level.

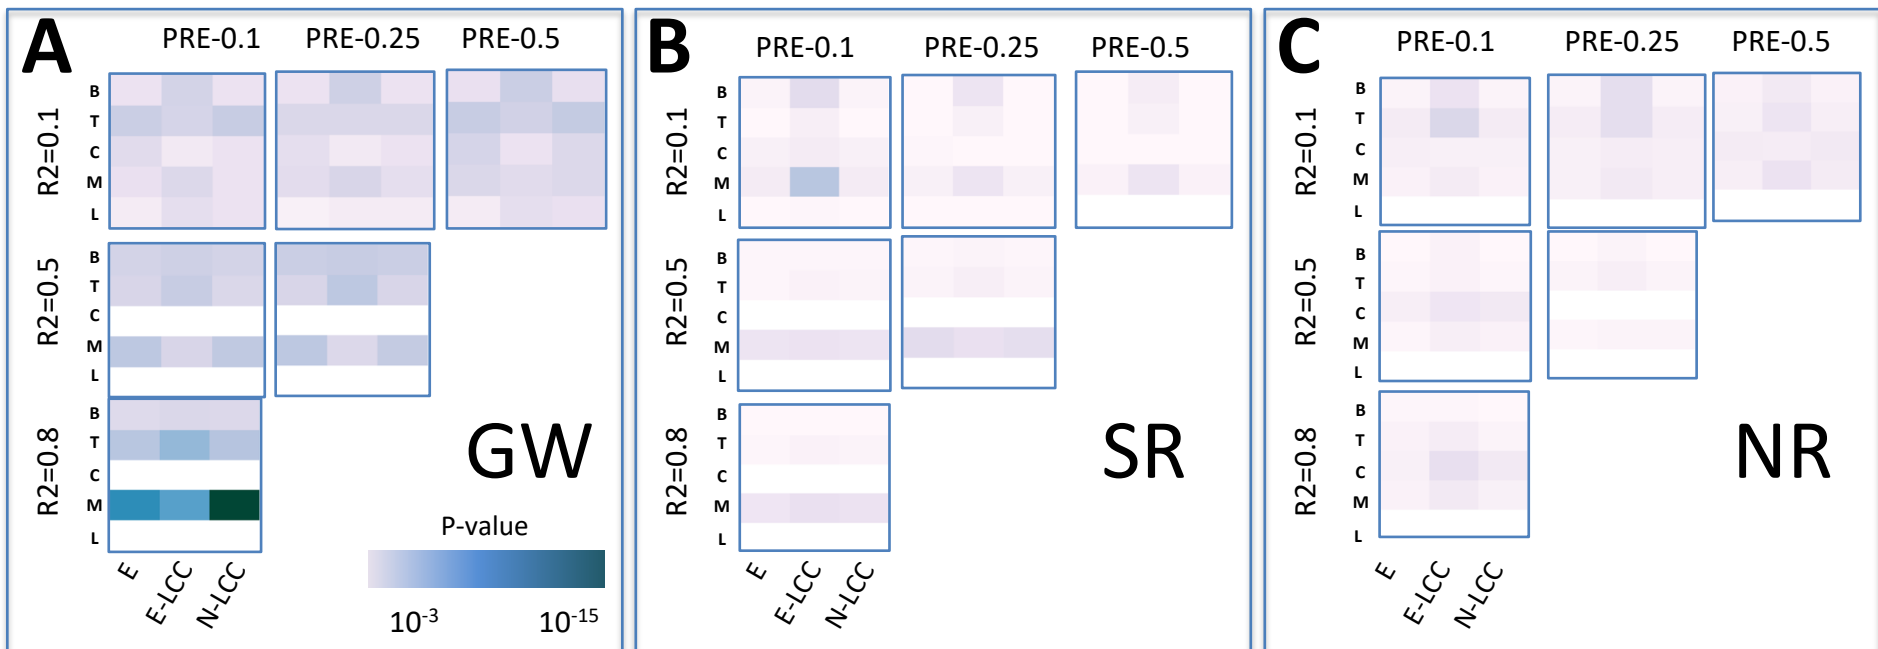

Supplementary Figure 2

**Supplementary Figure 2. Sensitivity analysis of cell-specific sub-networks.** Basic topological measures such as the number of edges of the entire sub-network (E) and the number of nodes (N-ECC) and edges (E-LCC) in the largest connected component were computed for networks generated using different PRE thresholds (10th, 25th, and 50th percentiles), and association  $r^2$  cut-offs (0.1, 0.5 and 0.8) for each cell type (B: B cells; T: T cells; C: CNS; M: monocytes; L: lung) at each level of confidence (GW, SR and NR). Each colored cell represents the significance of each tested network metric. Panel A shows that significant networks were obtained across a wide spectrum of conditions (the lower value observed at the 99th percentile is due to the small networks resulting from using that extreme PRE threshold). Panels B and C show that the significance of generated networks with SR and NR variants is much lower than with GW variants.

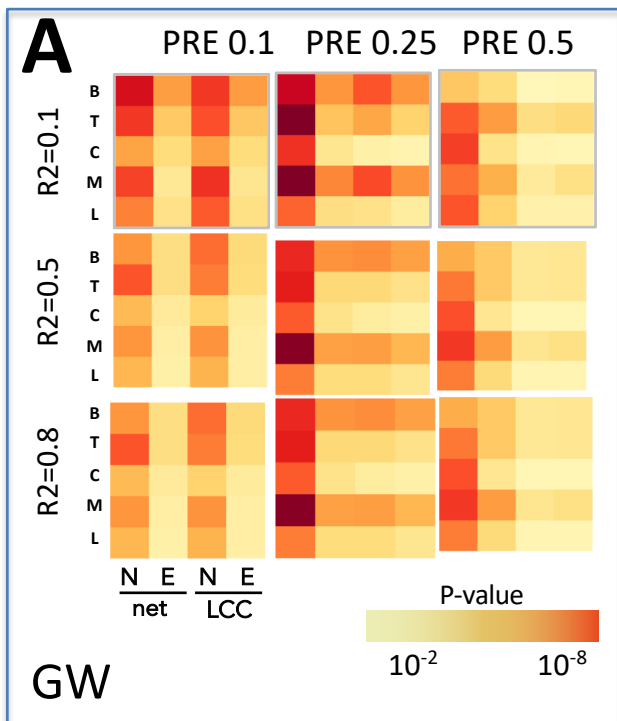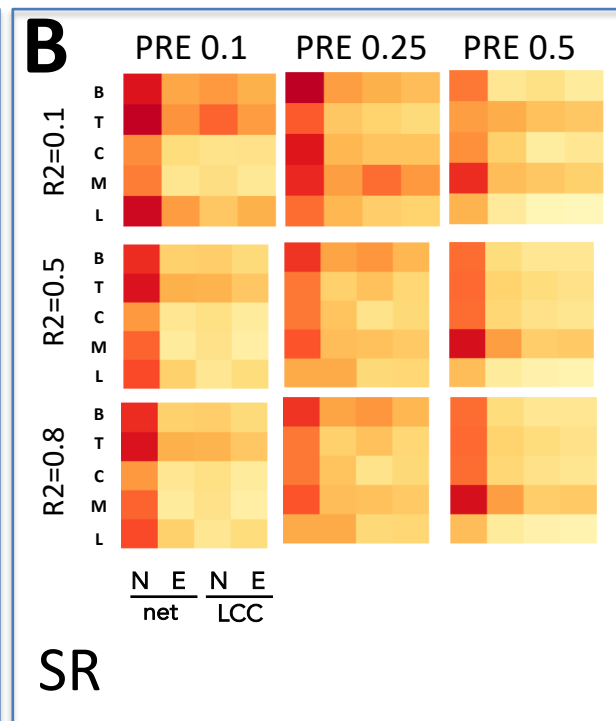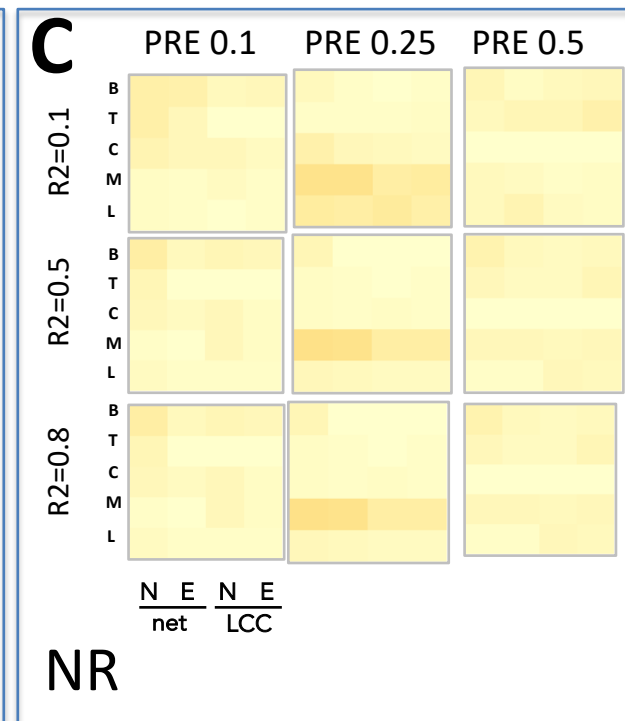

Supplementary Figure 3

**Supplementary Figure 3. Sensitivity analysis of individual-level networks.** Basic topological measures such as the number of nodes (N) and edges (E) of the entire sub-network and the number of nodes (N-ECC) and edges (E-LCC) in the largest connected component were computed for networks generated using different PRE thresholds (10th, 25th, and 50th percentiles), and association  $r^2$  cut-offs (0.1, 0.5 and 0.8) for each cell type (B: B cells; T: T cells; C: CNS; M: monocytes; L: lung) at each level of confidence (GW, SR and NR). Then, each metric was compared between cases and controls by means of T-test (1-tailed) to test the hypothesis that on average more significant networks are obtained for patients than for healthy controls. Each colored cell represents the significance of each tested network metric. Panel A shows that significant networks were obtained across a wide spectrum of conditions (the lower value observed at the 50th percentile is due to that only small networks result from using that extreme PRE threshold). Panel B shows that using variants from SR regions yields networks with significant differences between cases and controls. Panel C show that NR regions do not result in significant differences between cases and controls.

| Cell Type | Corr (r) | pval                  |
|-----------|----------|-----------------------|
| B         | 0.286    | $8.18 \cdot 10^{-54}$ |
| T         | 0.338    | $9.27 \cdot 10^{-76}$ |
| C         | 0.158    | $2.10 \cdot 10^{-17}$ |
| L         | 0.162    | $3.73 \cdot 10^{-18}$ |
| M         | 0.358    | $5.07 \cdot 10^{-85}$ |

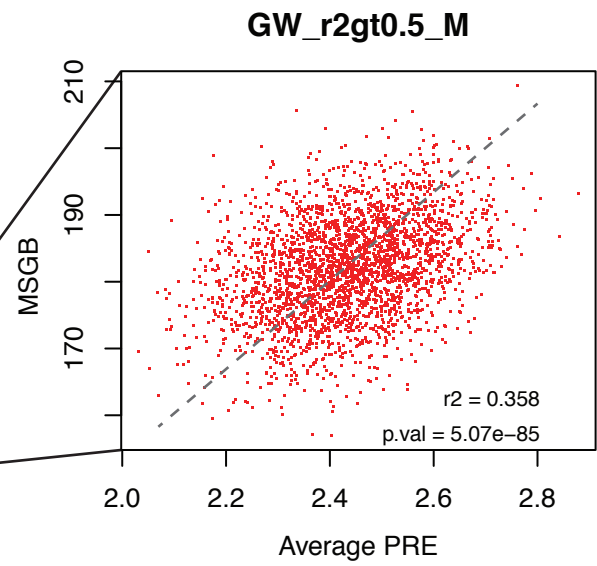

Supplementary Figure 4



**Supplementary Figure 4: Individual PREs correlate with global polygenic risk scores:** Cell-specific predicted regulatory effects (PRE) of 2,370 MS cases were correlated with their corresponding polygenic risk scores (MS genetic burden, MSGB). The table shows all correlations between MSGC and PRE for each cell type discussed in this paper. A representative scatter plot shows individual values of MSGB (Y-axis) and average PRE for monocytes (X-axis).

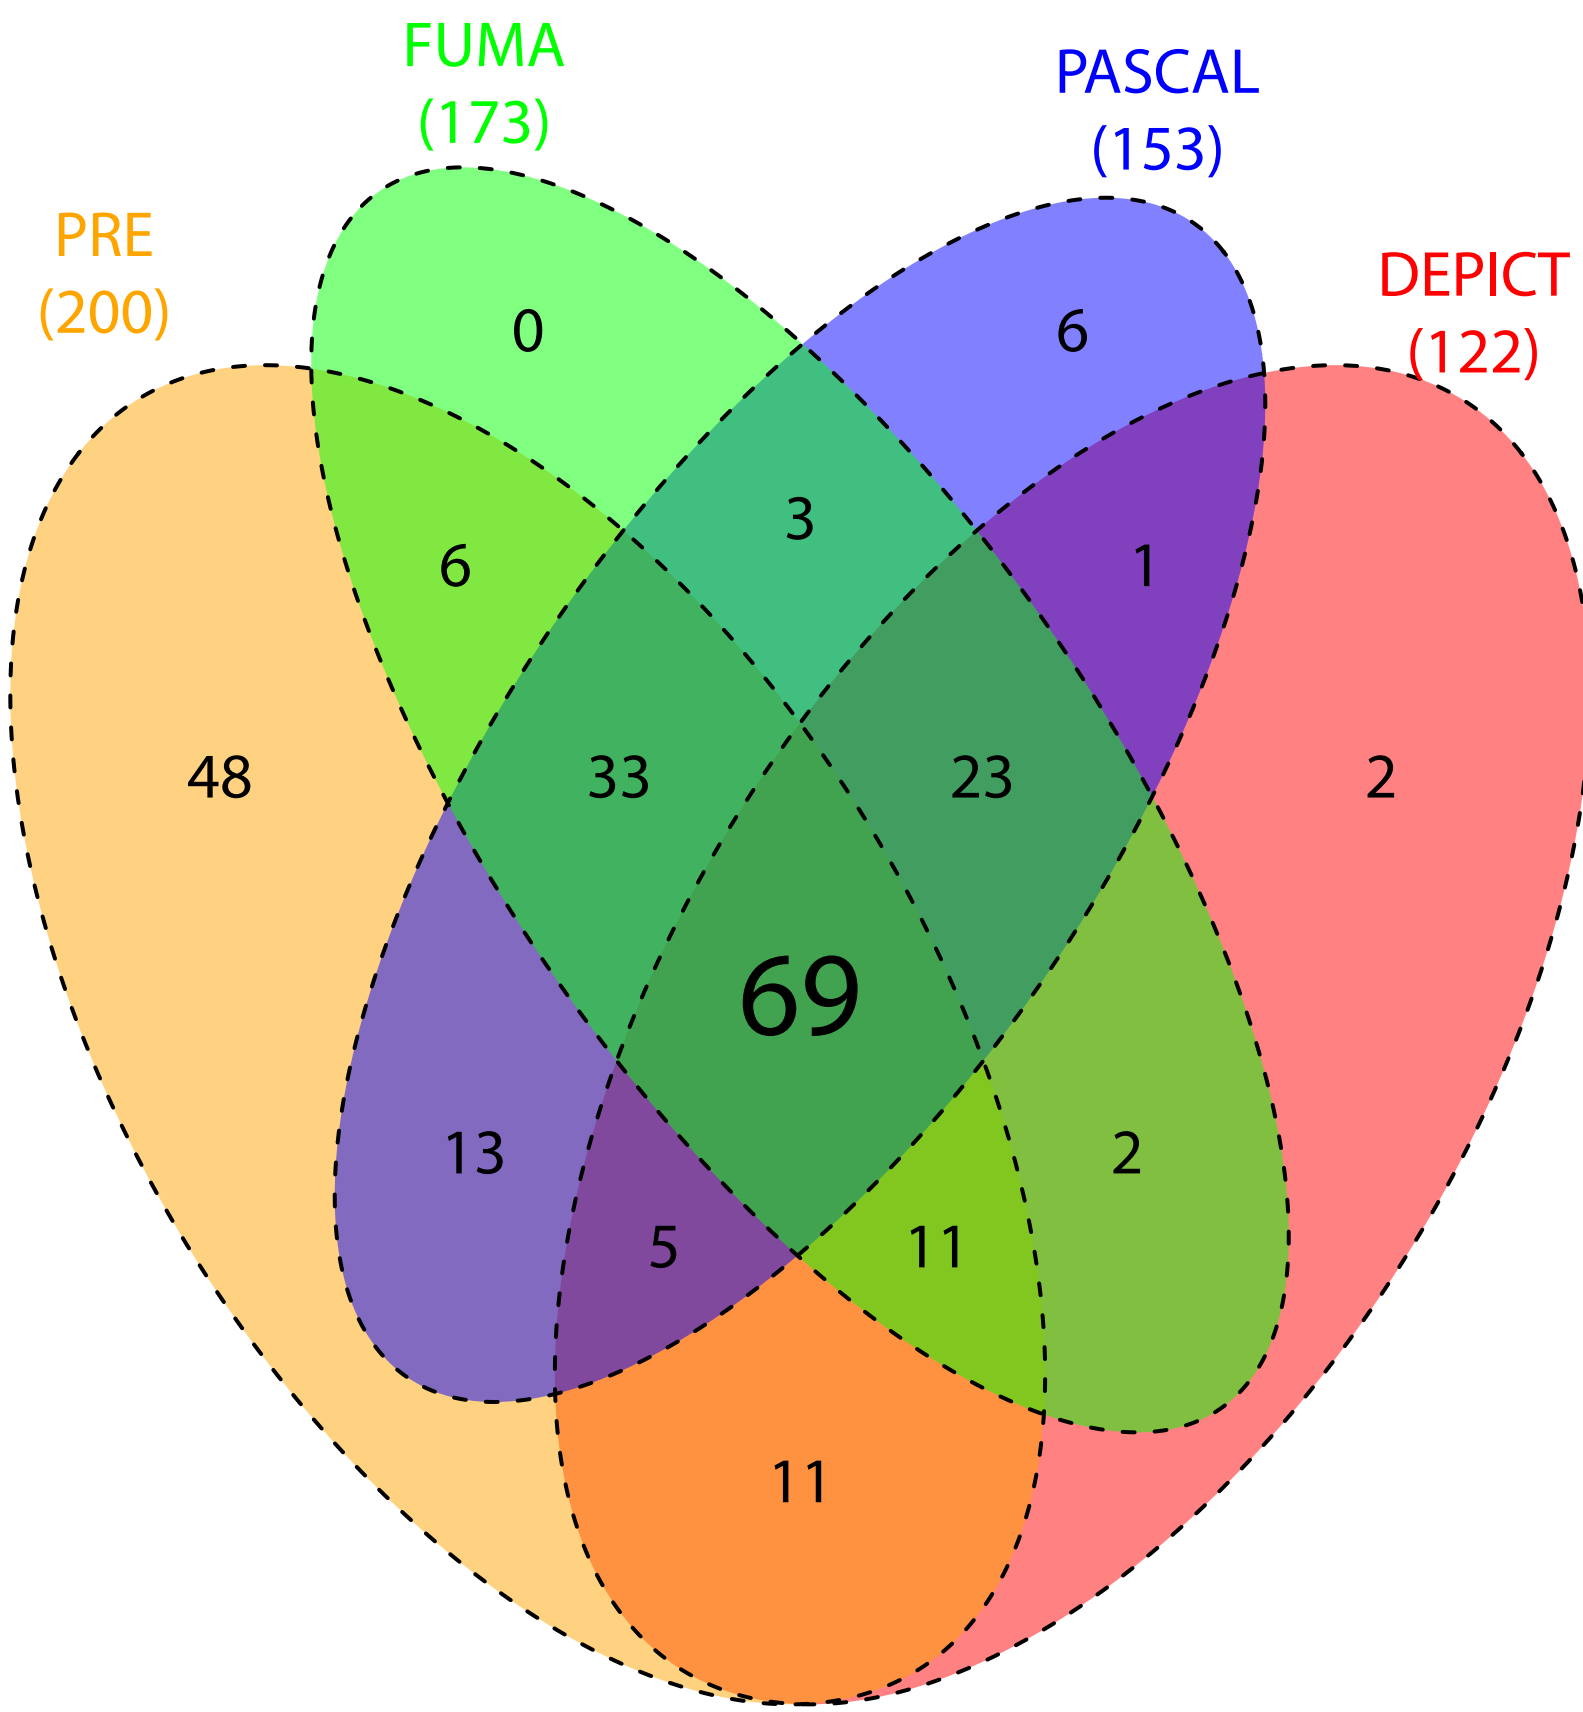

Supplementary Figure 5

**Supplementary Figure 5: Comparison of gene prioritization across three methods:** SNP to gene operations were computed in FUMA, DEPICT, and PASCAL and the results were compared to those obtained in this work. For 69 out of 200 loci the prioritized genes were the same across all methods. The method presented here produced a gene output for every association and shared the most genes with the other three methods (119 with FUMA, 96 with DEPICT, and 120 with PASCAL).

**Supplementary Table 1. Feature comparison with other pathway methods**

| Method                                                             | PRE | DEPICT | FUMA | PASCAL |
|--------------------------------------------------------------------|-----|--------|------|--------|
| SNP to gene mapping per cell/tissue type                           | Yes | No     | Yes  | No     |
| Cell type/Tissue specific gene prioritization                      | Yes | No     | Yes  | No     |
| Leverages SNP Regulatory information                               | Yes | No     | Yes  | No     |
| Takes into account SNPs in LD                                      | Yes | Yes    | Yes  | Yes    |
| Requires SNP p-values as input                                     | No  | No     | Yes  | Yes    |
| SNP filtering based on predicted functional annotations from tools | No  | No     | Yes  | No     |
| Genes assignment by proximity                                      | No  | Yes    | yes  | Yes    |
| Needs predefined gene sets                                         | Yes | Yes    | Yes  | Yes    |
| computes individual regulatory burden                              | Yes | No     | No   | No     |
| Enrichment analysis of prioritized genes in biological pathways    | Yes | Yes    | Yes  | Yes    |
| Default restriction based on MAF                                   | No  | Yes    | Yes  | Yes    |

Supplementary Table 2. Comparison of results with other pathway methods

| Effect         | PRE                             | Deplc1                                  | Fuma                                                                                                |
|----------------|---------------------------------|-----------------------------------------|-----------------------------------------------------------------------------------------------------|
| chr11:13878324 | DOX6                            | NA                                      | NA                                                                                                  |
| chr11:14886316 | RRAS2                           | NA                                      | NA                                                                                                  |
| chr13:10000952 | MIR581B TM5SF2                  | NA                                      | NA                                                                                                  |
| chr14:88523488 | GALC                            | NA                                      | NA                                                                                                  |
| chr16:11219951 | CLEC6A                          | NA                                      | NA                                                                                                  |
| chr16:11351879 | CLEC6A                          | NA                                      | NA                                                                                                  |
| chr1:154983036 | FLAD1                           | NA                                      | NA                                                                                                  |
| chr1:132788415 | FAM107B LCK                     | NA                                      | NA                                                                                                  |
| chr1:112429786 | ANAPC1 MERTK                    | NA                                      | NA                                                                                                  |
| chr3:100848597 | LOC152255 SENP7 ZPLD1           | NA                                      | NA                                                                                                  |
| chr3:112093983 | CD200R1                         | NA                                      | NA                                                                                                  |
| chr3:112765368 | IQCB1                           | NA                                      | NA                                                                                                  |
| chr3:121783015 | IQCB1                           | NA                                      | NA                                                                                                  |
| chr5:40429250  | DAB2 PTGER4                     | NA                                      | NA                                                                                                  |
| chr6:110315402 | FAM78B LMC9                     | NA                                      | NA                                                                                                  |
| chr6:130348257 | L3MBTL3                         | NA                                      | NA                                                                                                  |
| chr6:14691215  | CD83 JARID2 NA                  | NA                                      | NA                                                                                                  |
| chr7:50329339  | CTOP2 IKZF1                     | NA                                      | NA                                                                                                  |
| chr8:129177769 | LINC00977 MIR1208 PCAT1 POU5F18 | NA                                      | NA                                                                                                  |
| chr8:95851818  | INTS8                           | NA                                      | NA                                                                                                  |
| rs10063294     | CAPSL IL7R                      | IL7R                                    | IL7R                                                                                                |
| rs1014486      | IL12A LINC01100                 | IL12A                                   | IL12A                                                                                               |
| rs10191360     | CKCR4 DARS1 THSD7B              | CKCR4                                   | CKCR4                                                                                               |
| rs10207273     | CTOP2 IKZF1                     | NA                                      | NA                                                                                                  |
| rs10248667     | JAZF1 JAZF1-AS1                 | JAZF1                                   | JAZF1                                                                                               |
| rs10269216     | STAT3                           | STAT3                                   | STAT3 STAT3 PTFR                                                                                    |
| rs10271378     | ZCHH121 ZCHH1V1                 | ZCHH12                                  | ZCHH12 ZCHH1V1                                                                                      |
| rs1076928      | STK38                           | ETV7 KCTD20                             | ETV7 PKT1 KCTD20                                                                                    |
| rs1077667      | C3 TNFSF14                      | TNFSF14                                 | TNFSF14 C3                                                                                          |
| rs10801908     | CSF8                            | CSF8                                    | CSF8                                                                                                |
| rs1087056      | ZEB1-AS1 ZNF438                 | ZNF438                                  | NA                                                                                                  |
| rs10936182     | IL12A LINC01100                 | IL12A                                   | NA                                                                                                  |
| rs10936602     | LINC81 MYNN                     | NA                                      | ACTY13 MYNN LRRC34 LRN1Q4 LRRC31                                                                    |
| rs10951042     | CARD11 CHST12 SDK1              | CARD11                                  | NA                                                                                                  |
| rs10951154     | HDXA1 NA                        | NA                                      | HDXA1 HDXA2                                                                                         |
| rs11079788     | NPEPP5                          | NPEPP5                                  | ITGB3 ITGB3 EFCAB13 NPEPP5 KPNB1 TBKBP1                                                             |
| rs11083662     | NA                              | NA                                      | SAE1                                                                                                |
| rs11125803     | CENPO                           | NCOA1                                   | PRHND1 CENPO ADCY3                                                                                  |
| rs1121718      | HHEX IDE                        | HHEX                                    | IDE HIF1 HHEX                                                                                       |
| rs11161550     | BC110 C1orf52 LOC646626         | BC110                                   | NA                                                                                                  |
| rs11231749     | PLCB3 VEGFB                     | CCDC88B RPS6KA4 GPR137                  | NUDT22 DNAJC1 VEGFB FXBP2 PPP1R14B PLCB3 BAD GPR137 KCNK4 TEX40 ESRRA TRMT312 PRDX5 CCDC88B RPS6KA4 |
| rs11265699     | IL12RA IL2RA                    | IL2RA                                   | PRM7                                                                                                |
| rs11578655     | DPH6 SLCO7A7                    | NA                                      | EXTL1 SLCO7A7 DPH5 NA                                                                               |
| rs11749040     | DAB2 PTGER4                     | PTGER4                                  | NA                                                                                                  |
| rs1177728      | NDALGAP1 PUS10                  | PUS10                                   | PUS10 PELH3 RUA18A1                                                                                 |
| rs1180700      | EVS1 FAM69A                     | NA                                      | RPL5 FAM69A GF11 EVS1                                                                               |
| rs11852059     | FRMD6 GN2G                      | GN2G                                    | GN2G                                                                                                |
| rs11899404     | MIR4262 NA1 TRIB2               | NA                                      | NA                                                                                                  |
| rs11919880     | CCR4 GLB1                       | CCR4                                    | TRIM7 CCR4                                                                                          |
| rs12133753     | EVS1 FAM69A                     | TGFB3                                   | TGFB3                                                                                               |
| rs1247246      | TRAF3                           | TRAF3                                   | TRAF3                                                                                               |
| rs12211004     | RREB1                           | NA                                      | RREB1                                                                                               |
| rs1236699      | DOX6                            | CKCR5                                   | DDMG CKCR5                                                                                          |
| rs1243551      | ZFP96L1                         | ZFP96L1                                 | ZFP96L1                                                                                             |
| rs12475138     | HAD1 ZFP96L2                    | NA                                      | NA                                                                                                  |
| rs1250551      | ZMI21                           | ZMI21                                   | ZMI21                                                                                               |
| rs1258960      | TRAF3                           | TRAF3                                   | TRAF3                                                                                               |
| rs1269501      | SMARCC4                         | NA                                      | SMARCC4                                                                                             |
| rs12614091     | CD28 CTLA4 RAPH1                | CD28                                    | CD28                                                                                                |
| rs1262670      | FBXO4 PLEK                      | PLEK                                    | PLEK                                                                                                |
| rs1272559      | IL3RA IL2RA                     | IL2RA                                   | IL2RA RBM17                                                                                         |
| rs12832171     | TNFRSF1A U47924.1               | NA                                      | NA                                                                                                  |
| rs1292972      | DYNLRB2 WV0X                    | NA                                      | WV0X                                                                                                |
| rs12912929     | HES6 RP2 NA UBXN6               | NA                                      | UBXN6 HDGF12                                                                                        |
| rs13066789     | LPP                             | NA                                      | LPP                                                                                                 |
| rs13136820     | CHRNA9 RHOH                     | NA                                      | NA                                                                                                  |
| rs1322392      | RGS5                            | RGS5                                    | RGS5                                                                                                |
| rs13327021     | CEM1 EOMES                      | EOMES                                   | EOMES                                                                                               |
| rs13385171     | MIR4778 SPRED2                  | NA                                      | SPRED2                                                                                              |
| rs1341405      | LBIH                            | NA                                      | NA                                                                                                  |
| rs1365120      | PRR5L                           | PRR5L                                   | PRR5L                                                                                               |
| rs137955       | ENTHD1 GRAP2                    | ENTHD1 GRAP2                            | ENTHD1 GRAP2                                                                                        |
| rs1399180      | GATA3 GATA3-AS1 TAF3            | GATA3                                   | GATA3                                                                                               |
| rs1405122      | ODF3B SCD2                      | SCD2                                    | NCAPH2 SCD2 TYMP ODF3B                                                                              |
| rs1415069      | EVS1 FAM69A                     | EVS1 FAM69A                             | RPL5 FAM69A                                                                                         |
| rs146497       | SLC6A16 DKK1                    | SLC6A16 DKK1                            | SLC6A16 DKK1 TEAD2 DKK1 CCDC155 PTH2 GFY                                                            |
| rs17051321     | NDNF TNIP3                      | TNIP3                                   | TNIP3                                                                                               |
| rs1738074      | RSPH3 TAGAP                     | TAGAP                                   | RSPH3 TAGAP                                                                                         |
| rs17374508     | DYNLRB2 WV0X                    | NA                                      | NA                                                                                                  |
| rs1741873      | CAMK2G                          | PLAU                                    | CAMK2G PLAU C10orf55                                                                                |
| rs1780048      | IL20RA IL22RA2                  | TNFAIP3                                 | TNFAIP3                                                                                             |
| rs180069       | TNFRSF1A U47924.1               | NA                                      | PLEKHG6 TNFRSF1A SCNN1A                                                                             |
| rs1801138      | C12orf1                         | NA                                      | C1orf167 MTFR                                                                                       |
| rs2084007      | JADE2 TCF7                      | JADE2                                   | JADE2                                                                                               |
| rs2158879      | VMP1                            | VMP1                                    | VMP1 TUBB2L RPS6KB1 NA RNFT1                                                                        |
| rs248137       | BCL11                           | NA                                      | CYP4A11                                                                                             |
| rs269434       | MADD SPH1 DDB2 NR1H3 ACP2       | DDB2 ACP2 NR1H3 MADD MYBPC3 SPH1 RAPSIN | NA                                                                                                  |
| rs2780974      | CLEC16A                         | NA                                      | CITA DEX CLEC16A                                                                                    |
| rs280746       | CLB                             | CLB                                     | CLB                                                                                                 |
| rs2317231      | CRL3 FCRL3 FCRL3                | FCRL1 FCRL3                             | FCRL1 FCRL2 FCRL3                                                                                   |
| rs273786       | AHI1 MYB                        | MYB                                     | MYB                                                                                                 |
| rs231964       | IQCB1                           | IQCB1                                   | FBOA40 HCL1 IQCB1 EAF2                                                                              |
| rs2364485      | TNFRSF1A U47924.1               | NA                                      | NA                                                                                                  |
| rs244656       | JADE2 TCF7                      | TCF7                                    | TCF7                                                                                                |
| rs2469434      | CD226 NA                        | CD226                                   | CD226 CD226                                                                                         |
| rs246677       | NDFP1                           | NDFP1                                   | NDFP1                                                                                               |
| rs2546890      | LOC285626                       | IL28                                    | IL28                                                                                                |
| rs258447       | BCL11                           | NA                                      | CYP4A11                                                                                             |
| rs2590438      | LPP                             | BCL6                                    | NA                                                                                                  |
| rs2705616      | AFF1 LOC100506746               | AFF1                                    | C6orf38 AFF1                                                                                        |
| rs2726479      | PRK2                            | TTI2                                    | TTI2 PRK2                                                                                           |
| rs283438       | ERG                             | TMPRSS3 ERG                             | ERG                                                                                                 |
| rs2870378      | PKA                             | PKA                                     | NA                                                                                                  |
| rs2834106      | SMARCC4                         | NA                                      | SEAF1                                                                                               |
| rs2886736      | TNFRSF25                        | TNFRSF25                                | ESPN1 TNFRSF25 PLEKHG5                                                                              |
| rs3184504      | HCTD10                          | SH2B3 TRAFD1                            | SH2B3 ATXN2 BRAP1 CACAO10 NA ALDH2 MAPKAPK5 NAAS2 TRAFD1 HCTD4 RL6 PTPN11                           |
| rs32058        | TNFAIP8                         | TNFAIP8                                 | TNFAIP8                                                                                             |
| rs34026809     | DOX6                            | CKCR5                                   | ARCN1 PHLDB1 TRESH                                                                                  |
| rs3493443      | SMARCC4                         | NA                                      | ZGFP1 FOXJ1 NA NA RAVER1 TYK2 CDC37 PDE4A                                                           |
| rs3461760      | PAOT                            | NA                                      | PAOT                                                                                                |
| rs3469501      | BATF ELVCR2                     | BATF                                    | BATF                                                                                                |
| rs3472376      | DPH6 SLCO7A7                    | NA                                      | NA                                                                                                  |
| rs3494766      | CLEC16A                         | PRM2 CLEC16A                            | PRM2 PRM2 PRM2 PRM2 LOC600499                                                                       |
| rs35218683     | IFTM3                           | IFTM3                                   | NA                                                                                                  |
| rs354033       | ZNF746                          | ZNF746                                  | ZNF746                                                                                              |
| rs3548093      | BC110 C1orf52 LOC646626         | BC110                                   | C1orf52 BC110                                                                                       |
| rs35540610     | SP110 SP140                     | SP140 SP110                             | SP110 SP140                                                                                         |
| rs35703946     | IRF8 LINC01082                  | IRF8                                    | NA                                                                                                  |
| rs373798       | CD48 VANGL2                     | NA                                      | VANGL2                                                                                              |
| rs380627       | GDOP3                           | TBXS6 PPP4C YPEL3                       | ALDOA PPP4C TBXS6 YPEL3 GDOP3 MAPK3                                                                 |
| rs3923387      | PLEC                            | PARPAD0 GRIN1A PLEC                     | PLEC PARPAD0 GRIN1A SPATC1                                                                          |
| rs405143       | SCCH1 SSTR5-AS1                 | NA                                      | NA                                                                                                  |
| rs4267739      | ETS1                            | ETS1                                    | ETS1                                                                                                |
| rs4325907      | LOC152255 SENP7 ZPLD1           | ZPLD1                                   | NA                                                                                                  |
| rs438613       | CNK1 EOMES                      | NA                                      | NA                                                                                                  |
| rs4409785      | FAM78B ISEN3                    | NA                                      | NA                                                                                                  |
| rs4728142      | IRF5 KCP                        | IRF5                                    | IRF5                                                                                                |
| rs4796224      | GGNB2                           | NA                                      | ZNHIT3 MYO3B RIGWI GONBP3 DNR131 MBM1                                                               |
| rs4808760      | MARCKS1                         | IFB1 MARCKS1                            | IL12RB1 MARCKS1 PRK2B2 IFB1 MPB2 7L2 RABA3 PDE4C                                                    |
| rs4812772      | TOX2                            | TOX2                                    | TOX2                                                                                                |
| rs4820955      | LMR2                            | NA                                      | NA                                                                                                  |
| rs483130       | PRGCH                           | NA                                      | PRGCH                                                                                               |
| rs486153       | AHI1 MYB                        | NA                                      | AHI1                                                                                                |
| rs493980       | CD6 CD6                         | CD6                                     | CD6                                                                                                 |
| rs4940730      | MALT1                           | ALPK2                                   | ALPK2                                                                                               |
| rs531612       | SART1                           | CTSW C1orf68                            | FIBP1 CCDC85 FOSL1 C1orf68 DRAP1 SART1 E1FAD BANF1 CST6 CATSPER1                                    |
| rs53858457     | CARD21 CHST12 SDK1              | NA                                      | CHST12                                                                                              |
| rs5469140      | FAM78B ISEN3                    | NA                                      | NA                                                                                                  |
| rs57116599     | ANAPC1 MERTK                    | MERTK                                   | MERTK TMEM878                                                                                       |
| rs5756405      | CSF2RB NCF4                     | CSF2RB                                  | CSF2RB NCF4                                                                                         |
| rs5816386      | EPSC1                           | NA                                      | EPSC1 GABR3 NA C19orf44                                                                             |
| rs5834161      | EVS1 FAM69A                     | NA                                      | C1orf146 GLMN GF11 EVS1                                                                             |
| rs5856522      | C1orf106 K21B                   | KIF21B                                  | C1orf106 KIF21B CACNA1S                                                                             |
| rs600055       | PTPN1                           | SLC34B                                  | SLC34B                                                                                              |
| rs602662       | CD40 NCOA5 SLC12A5              | SLC12A5 NCOA5 CD40                      | SLC12A5 NCOA5 CD40                                                                                  |
| rs6060003      | ELMO1                           | ELMO1                                   | ELMO1                                                                                               |
| rs6072343      | NA                              | NA                                      | OPR1 PRG1 ZMK3 LNK3 EMLNK3                                                                          |
| rs6170825      | PLUNC1                          | PLUNC1                                  | PLUNC1                                                                                              |
| rs61863928     | ADO1 ZNF365                     | ADO                                     | NA                                                                                                  |
| rs6188005      | RRAS2                           | RRAS2 PDC3B                             | RRAS2 COPB1 PSMA1 PSMA1                                                                             |
| rs62013236     | CTSH                            | CTSH                                    | CTSH RASGRF1                                                                                        |
| rs62420820     | IL20RA IL22RA2                  | IL22RA2                                 | NA                                                                                                  |
| rs631204       | IL20RA IL22RA2                  | NA                                      | NA                                                                                                  |
| rs6427540      | CD48 VANGL2                     | SLAMPF1                                 | SLAMPF1 CD48                                                                                        |
| rs649663       | IQGAP1                          | IQGAP1                                  | GABARAPL3 ZNF774 IQGAP1                                                                             |
| rs6533052      | LIME2 SLC9B2 UBE2D3             | NA                                      | LIME1A UBE2D3 CSD2 SLC9B1 SLC9B2                                                                    |
| rs6564881      | DOX6                            | CKCR5                                   | CKCR5                                                                                               |
| rs6589706      | LRX5A UBXN6                     | LRX5A UBXN6                             | LRX5A UBXN6                                                                                         |
| rs6589939      | LRX5A UBXN6                     | LRX5A UBXN6                             | LRX5A UBXN6                                                                                         |
| rs6670198      | TNFRSF14 UBE2D3                 | TNFRSF14 C1orf93                        | TNFRSF14 FAM213B MMEL1 TTCC4                                                                        |
| rs6672420      | RUNX3 SYF2                      | RUNX3                                   | RUNX3                                                                                               |
| rs6711717      | LMNA2                           | RGS4                                    | LMNA2 RGS4 SLC34A1                                                                                  |
| rs6728644      | NA STAT4                        | STAT4                                   | STAT4                                                                                               |
| rs6742         | ZGPAT                           | NA                                      | ZGPAT NA LIME1 NA SLC2A4R6 ZBTB46                                                                   |
| rs6789653      | ZBTB38                          | RASA2 ZBTB38                            | NA                                                                                                  |

|            |                                |                                      |                                                                                                                     |
|------------|--------------------------------|--------------------------------------|---------------------------------------------------------------------------------------------------------------------|
| rs67934705 | NA                             | NA                                   | NA                                                                                                                  |
| rs6837324  | TEC1 TRK                       | TRK1 TEC                             | TRK1 TEC                                                                                                            |
| rs6911311  | FUCA2 LOC285740                | PHACTR2                              | PHACTR2                                                                                                             |
| rs6990534  | LINC00977 MR1208 PCAT1 POU5F18 | PVT1                                 | NA                                                                                                                  |
| rs701006   | TSFM                           | CYP27B1 MARCB9 METTL21B BAGALNT1 OS9 | OTX3 ARHGFE25 SLC26A10 BAGALNT1 OS9 AGAP2 AGAP2-AS1 TSPAN31 CDK4 MARCB9 CYP27B1 METTL1 METTL21B NA TSFM AVIL CTDSP2 |
| rs719316   | ATXN1                          | ATXN1                                | ATXN1                                                                                                               |
| rs7222450  | MAP3K14                        | NA                                   | NA                                                                                                                  |
| rs7260482  | PVR                            | PVR                                  | KSF23 PVR CEACAM19                                                                                                  |
| rs7292276  | JAK1                           | JAK1                                 | BAVER2 JAK1                                                                                                         |
| rs72928038 | BACH2                          | BACH2                                | BACH2                                                                                                               |
| rs73989863 | MARCH1                         | MARCH1                               | MARCH1                                                                                                              |
| rs7414214  | SYPL1                          | NA                                   | SYPL1                                                                                                               |
| rs735542   | LINC00977 MR1208 PCAT1 POU5F18 | NA                                   | NA                                                                                                                  |
| rs760517   | CSF2RB NCF4                    | NCF4                                 | NCF4                                                                                                                |
| rs7731626  | ANKRD55 NA                     | NA                                   | ANKRD55                                                                                                             |
| rs7855251  | NANS                           | NA                                   | TRIM14                                                                                                              |
| rs7975763  | MPHOSPH8                       | RILPL2 PTPNM2                        | ABC89 OGFOD2 ARL69A4 PTPNM2 MPHOSPH9 C12orf165 CDK2AP1 SBN01 SETD8 RILPL2                                           |
| rs7977700  | CLEC2D CLEC1                   | CLEC1 CLEC2D                         | CLEC2D CLEC1                                                                                                        |
| rs802730   | NA                             | NA                                   | PTRK                                                                                                                |
| rs8062446  | NLRCS                          | NLRCS                                | NLRCS                                                                                                               |
| rs833871   | GSDMB                          | NA                                   | THRA HR101                                                                                                          |
| rs9308424  | BATF3 UBE2D3                   | BATF3                                | BATF3                                                                                                               |
| rs9568402  | DEU1 ST13P4                    | NA                                   | DEU1                                                                                                                |
| rs9591325  | DEU1 ST13P4                    | NA                                   | DEU1                                                                                                                |
| rs9610458  | MAPK1                          | PPM1F                                | YPEL1 MAPK1 PPM1F TOP3B                                                                                             |
| rs962052   | NA RBM33 RND3                  | NA                                   | NA                                                                                                                  |
| rs9828713  | ILDR1                          | FIGR2                                | FIGR2 TMEM508                                                                                                       |
| rs983494   | CDM8 VANGL2                    | SLAMF7                               | SLAMF7                                                                                                              |
| rs9843355  | ARHGAP31                       | CD80 ARHGAP31 POGLUT1 TMEM39A        | ARHGAP31 TMEM39A POGLUT1 TIMMDC1 CD80                                                                               |
| rs983496   | KCNH1 SATB1                    | SATB1                                | NA                                                                                                                  |
| rs9878602  | FOXP1                          | FOXP1                                | FOXP1                                                                                                               |
| rs9900529  | GRB2                           | GRB2 GGA3 MIF4G2 SLC25A19 TSEN54     | SLC25A19 GRB2                                                                                                       |
| rs9909593  | GSDMB                          | GSDMB HNF3J ORMDL3                   | GRB2 HNF3J ZFP2 GSDMB ORMDL3 LRRCC3C                                                                                |
| rs9955954  | MALT1                          | MALT1                                | MALT1                                                                                                               |
| rs9992763  | LEF1 RPL34-AS1                 | LEF1                                 | LEF1                                                                                                                |

**Supplementary Table 3. RegulomeDB content**

| Data Type                                  | Types                           | Features    |
|--------------------------------------------|---------------------------------|-------------|
| Transcription Factor CHIP-seq (ENCODE)     | 495 conditions/cell lines       | 7,721,822   |
| Transcription Factor CHIP-seq (non-ENCODE) | 32 conditions/cell lines        | 397,534     |
| Transcription Factor CHIP-exo              | 1 condition                     | 35,161      |
| Histone Modifications                      | 284 conditions/cell lines/marks | 23,055,241  |
| Dnase I hypersensitive sites               | 114 conditions/cell lines       | 20,710,098  |
| FAIRE sites                                | 25 conditions/cell lines        | 4,816,196   |
| Dnase I footprints                         | 50 cell lines                   | 128,266,803 |
| Predicted binding (PWMs)                   | 1158 motifs                     | 239,713,973 |
| eQTLs                                      | 142,945 SNPs                    | 142,945     |
| dsQTLs                                     | 6069 SNPs                       | 6,069       |
| Manual annotations                         | 6 genomic regions               | 282         |
| VISTA enhancers                            | 1448 enhancers                  | 1,325       |
| Validated SNPs affecting binding           | 855 SNPs                        | 855         |

| <b>Key</b> |                                                   |
|------------|---------------------------------------------------|
| Data Type  | Type of regulatory feature hosted by RegulomeDB   |
| Types      | Detailed content for each data type               |
| Features   | Total amount of regulatory features for data type |

Supplementary Table 4. ENCODE cell types used in this analysis

| cell_line_name           | ENCODE_Tier | Description                                                                                                                                                                            | Tissue            | Karyotype |
|--------------------------|-------------|----------------------------------------------------------------------------------------------------------------------------------------------------------------------------------------|-------------------|-----------|
| GM13976                  |             | 3 lymphoblastoid cell line, clinically normal; monozygotic twin sister with Cornelia De Lange syndrome is GM13977                                                                      | blood             | normal    |
| GM12878                  |             | 1 B-lymphocyte, lymphoblastoid, International HapMap Project - CEPH/Utah - European Caucasian, Epstein-Barr Virus                                                                      | blood             | normal    |
| CD20+                    |             | 2 B cells from donors RO01778 and RO01794, newly promoted to tier 2: not in 2011 analysis                                                                                              | blood             | normal    |
| CD20+ RO01778            |             | 2 B cells, caucasian, draw number 1, newly promoted to tier 2: not in 2011 analysis                                                                                                    | blood             | normal    |
| CD20+ RO01794            |             | 2 B cells, African American, draw number 1, newly promoted to tier 2: not in 2011 analysis                                                                                             | blood             | normal    |
| GM10248                  |             | 3 lymphoblastoid cell line, Clinically normal; 4 paternal cousins have Cornelia de Lange syndrome; 46,XY, t(3;22)(q25.3;p12)                                                           | blood             | normal    |
| GM12878-XiMat            |             | 3 B-lymphocyte, lymphoblastoid, cloned for maternal X inactivation, International HapMap Project, CEPH/Utah, Epstein-Barr Virus                                                        | blood             | normal    |
| GM12871                  |             | 3 B-lymphocyte, lymphoblastoid, International HapMap Project, CEPH/Utah pedigree 1459, treatment: Epstein-Barr Virus transformed.                                                      | blood             | normal    |
| GM12872                  |             | 3 B-lymphocyte, lymphoblastoid, International HapMap Project, CEPH/Utah pedigree 1459, treatment: Epstein-Barr Virus transformed                                                       | blood             | normal    |
| GM18507                  |             | 3 lymphoblastoid, International HapMap Project, Yoruba in Ibadan, Nigeria, treatment: Epstein-Barr Virus transformed                                                                   | blood             | normal    |
| GM06990                  |             | 3 B-lymphocyte, lymphoblastoid, International HapMap Project, CEPH/Utah, treatment: Epstein-Barr Virus transformed                                                                     | blood             | normal    |
| GM10847                  |             | 3 lymphoblastoid, International HapMap Project, CEPH/Utah, treatment: Epstein-Barr Virus transformed                                                                                   | blood             | normal    |
| GM12801                  |             | 3 B-lymphocyte, lymphoblastoid, International HapMap Project, CEPH/Utah, treatment: Epstein-Barr Virus transformed                                                                     | blood             | normal    |
| GM12812                  |             | 3 B-lymphocyte, lymphoblastoid, International HapMap Project, CEPH/Utah, Treatment: Epstein-Barr Virus transformed                                                                     | blood             | normal    |
| GM12813                  |             | 3 B-lymphocyte, lymphoblastoid, International HapMap Project, CEPH/Utah, Treatment: Epstein-Barr Virus transformed                                                                     | blood             | normal    |
| GM12864                  |             | 3 B-lymphocyte, lymphoblastoid, International HapMap Project, CEPH/Utah pedigree 1459, treatment: Epstein-Barr Virus transformed                                                       | blood             | normal    |
| GM12865                  |             | 3 B-lymphocyte, lymphoblastoid, International HapMap Project, CEPH/Utah pedigree 1459, treatment: Epstein-Barr Virus transformed                                                       | blood             | normal    |
| GM12866                  |             | 3 B-lymphocyte, lymphoblastoid, International HapMap Project, CEPH/Utah pedigree 1459, treatment: Epstein-Barr Virus transformed.                                                      | blood             | normal    |
| GM12867                  |             | 3 B-lymphocyte, lymphoblastoid, International HapMap Project, CEPH/Utah pedigree 1459, treatment: Epstein-Barr Virus transformed.                                                      | blood             | normal    |
| GM12868                  |             | 3 B-lymphocyte, lymphoblastoid, International HapMap Project, CEPH/Utah pedigree 1459, treatment: Epstein-Barr Virus transformed.                                                      | blood             | normal    |
| GM12869                  |             | 3 B-lymphocyte, lymphoblastoid, International HapMap Project, CEPH/Utah pedigree 1459, treatment: Epstein-Barr Virus transformed.                                                      | blood             | normal    |
| GM12870                  |             | 3 B-lymphocyte, lymphoblastoid, International HapMap Project, CEPH/Utah pedigree 1459, treatment: Epstein-Barr Virus transformed.                                                      | blood             | normal    |
| GM12873                  |             | 3 B-lymphocyte, lymphoblastoid, International HapMap Project, CEPH/Utah pedigree 1459, treatment: Epstein-Barr Virus transformed.                                                      | blood             | normal    |
| GM12874                  |             | 3 B-lymphocyte, lymphoblastoid, International HapMap Project, CEPH/Utah pedigree 1459, treatment: Epstein-Barr Virus transformed                                                       | blood             | normal    |
| GM12875                  |             | 3 B-lymphocyte, lymphoblastoid, International HapMap Project, CEPH/Utah pedigree 1459, treatment: Epstein-Barr Virus transformed                                                       | blood             | normal    |
| GM12891                  |             | 3 B-lymphocyte, lymphoblastoid, International HapMap Project, CEPH/Utah pedigree 1463, treatment: Epstein-Barr Virus transformed                                                       | blood             | normal    |
| GM12892                  |             | 3 B-lymphocyte, lymphoblastoid, International HapMap Project, CEPH/Utah pedigree 1463, treatment: Epstein-Barr Virus transformed                                                       | blood             | normal    |
| GM15510                  |             | 3 lymphoblastoid NIGMS Human Genetic Cell Repository, DNA Polymorphism Discovery Resource Collection, treatment: Epstein-Barr Virus transformed                                        | blood             | normal    |
| GM18505                  |             | 3 lymphoblastoid, International HapMap Project, Yoruba in Ibadan, Nigeria, treatment: Epstein-Barr Virus transformed                                                                   | blood             | normal    |
| GM18526                  |             | 3 lymphoblastoid, International HapMap Project, Han Chinese in Beijing, China, treatment: Epstein-Barr Virus transformed                                                               | blood             | normal    |
| PBMC                     |             | 3 peripheral blood mononuclear cells                                                                                                                                                   | blood             | normal    |
| GM19099                  |             | 3 lymphoblastoid, International HapMap Project, Yoruba in Ibadan, Nigeria, treatment: Epstein-Barr Virus transformed                                                                   | blood             | normal    |
| GM19193                  |             | 3 lymphoblastoid, International HapMap Project, Yoruba in Ibadan, Nigeria, treatment: Epstein-Barr Virus transformed                                                                   | blood             | normal    |
| GM19238                  |             | 3 B-lymphocyte, lymphoblastoid, International HapMap Project, Yoruba in Ibadan, Nigeria, treatment: Epstein-Barr Virus transformed                                                     | blood             | normal    |
| GM18951                  |             | 3 lymphoblastoid, International HapMap Project, Japanese in Tokyo, Japan, treatment: Epstein-Barr Virus transformed                                                                    | blood             | normal    |
| H0287                    |             | 3 EBV-transformed lymphoblastoid cell line (LCL) was derived from peripheral blood donated by a normal healthy male.                                                                   | blood             | normal    |
| Lymphoblastoid           |             | 3 parental cell type to lymphoblastoid cell lines                                                                                                                                      | blood             | normal    |
| Lymphoblastoid_cell_line |             | 3 parental cell type to lymphoblastoid cell lines                                                                                                                                      | blood             | normal    |
| H0287                    |             | 3 EBV-transformed lymphoblastoid cell line (LCL) was derived from peripheral blood donated by a normal healthy male.                                                                   | blood             | normal    |
| GM19239                  |             | 3 B-lymphocyte, lymphoblastoid, International HapMap Project, Yoruba in Ibadan, Nigeria, treatment: Epstein-Barr Virus transformed                                                     | blood             | normal    |
| GM19240                  |             | 3 B-lymphocyte, lymphoblastoid, International HapMap Project, Yoruba in Ibadan, Nigeria, treatment: Epstein-Barr Virus transformed                                                     | blood             | normal    |
| H0287                    |             | 3 EBV-transformed lymphoblastoid cell line (LCL) was derived from peripheral blood donated by a normal healthy male.                                                                   | blood             | normal    |
| Frontal_cortex_OC        |             | 3 Primary ventromedial prefrontal cortex, from KPBBB donor IDs 673 (Rep B1) and 913 (Rep B2)                                                                                           | frontal cortex    | normal    |
| H1-neurons               |             | 2 neurons derived from H1 embryonic stem cells, newly promoted to tier 2: not in 2011 analysis                                                                                         | neurons           | normal    |
| HAc                      |             | 3 astrocytes-cerebellar                                                                                                                                                                | cerebellar        | normal    |
| NH-A                     |             | 3 astrocytes (also called Astrocy)                                                                                                                                                     | brain             | normal    |
| Pons_OC                  |             | 3 Primary frozen pons mid-brain tissue from NICHD donor IDs 1104 (Rep B1), 602 (Rep B2), 1442 (Rep B3)                                                                                 | pons mid-brain    | normal    |
| BC_Brain_H11058N         |             | 3 brain, donor H11058N, age 66, Asian, DNA extract                                                                                                                                     | brain             | normal    |
| Cerebellum_OC            |             | 3 Primary frozen cerebellum tissue from NICHD donor IDs 1104 (Rep B1), 602 (Rep B2), 1442 (Rep B3), all Caucasian                                                                      | cerebellum        | normal    |
| Cerebrum_frontal_OC      |             | 3 Primary frozen frontal cerebrum tissue from NICHD donor IDs 1104 (Rep B1), 602 (Rep B2), 1442 (Rep B3), all Caucasian                                                                | frontal cerebrum  | normal    |
| HA-sp                    |             | 3 astrocytes spinal cord                                                                                                                                                               | spinal cord       | normal    |
| HA-h                     |             | 3 astrocytes-hippocampal                                                                                                                                                               | brain hippocampus | normal    |
| IMR90                    |             | 2 fetal lung fibroblasts, newly promoted to tier 2: not in 2011 analysis                                                                                                               | lung              | normal    |
| AG04450                  |             | 3 fetal lung fibroblast                                                                                                                                                                | lung              | normal    |
| BC_Lung_01-11002         |             | 3 lung, donor 01-11002, age 83, caucasian, DNA and RNA extract                                                                                                                         | lung              | normal    |
| BC_Lung_H12817N          |             | 3 lung, donor H12817N, age 71, caucasian, DNA and RNA extract                                                                                                                          | lung              | normal    |
| HPF                      |             | 3 pulmonary fibroblasts isolated from lung tissue                                                                                                                                      | lung              | normal    |
| Lung_BC                  |             | 3 lung, parental cell type to donors 01-11002 and H12817N                                                                                                                              | lung              | normal    |
| Lung_OC                  |             | 3 Primary frozen lung tissue from NICHD donor IDs 1104 (Rep B1 DNase), 602 (Rep B2 DNase), 1442 (Rep B3 DNase) and CF Center donor IDs DD0061 (Rep B1 FAIRE) and DD0071 (Rep B2 FAIRE) | Lung              | normal    |
| NHLF                     |             | 3 lung fibroblasts                                                                                                                                                                     | lung              | normal    |
| WI-38                    |             | 3 embryonic lung fibroblast cells, hTERT immortalized, includes Raf1 construct                                                                                                         | embryonic lung    | normal    |
| FibroP_AG08396           |             | 3 fibroblasts taken from individuals with Parkinson's disease                                                                                                                          | lung fibroblast   | normal    |
| hMNC-CB                  |             | 3 Mononuclear Cells (umbilical cord blood-single donor) from two individuals, hMNC-CB_9111701.6 and hMNC-CB_8072802.6                                                                  | blood             | normal    |
| hMNC-CB_8072802.6        |             | 3 Mononuclear Cells, umbilical cord blood-single donor                                                                                                                                 | blood             | normal    |



|                          |                                                                                                                                                                                                                                                                                   |                                |        |
|--------------------------|-----------------------------------------------------------------------------------------------------------------------------------------------------------------------------------------------------------------------------------------------------------------------------------|--------------------------------|--------|
| Monocytes-CD14+          | Monocytes-CD14+ are CD14-positive cells from human leukapheresis production, from donor RO 01746 (draw 1 ID is RO 01746, draw 2 ID is RO 01826), newly promoted to tier 2: not in 2011 analysis                                                                                   | monocytes                      | normal |
| Monocytes-CD14+ RO01746  | Monocytes-CD14+ are CD14-positive cells from human leukapheresis production, from donor RO 01746 (draw 1 ID is RO 01746, draw 2 ID is RO 01826), Monocytes-CD14+ RO01746 and Monocytes-CD14+ RO01826 are being used as replicates, newly promoted to tier 2: not in 2011 analysis | monocytes                      | normal |
| Monocytes-CD14+ RO01826  | Monocytes-CD14+ are CD14-positive cells from human leukapheresis production, Monocytes-CD14+_RO01826 is a second draw being used as a replicate for                                                                                                                               | monocytes                      | normal |
| GC_B_cell                | 2 Monocytes-CD14+ RO01746, newly promoted to tier 2: not in 2011 analysis                                                                                                                                                                                                         | tonsil                         | normal |
| BC_Stomach_H12817N       | 3 Germinal center B cells (CD77+) isolated from de-identified tonsillectomy                                                                                                                                                                                                       | stomach                        | normal |
| Endometrium_OC           | 3 stomach, donor H12817N, age 71, caucasian, DNA and RNA extract                                                                                                                                                                                                                  | endometrium                    | normal |
| Fibrobl_GM03348          | 3 Endometrium isolated from uterine lining                                                                                                                                                                                                                                        | skin                           | normal |
| FibroP                   | 3 skin fibroblast                                                                                                                                                                                                                                                                 | skin                           | normal |
| GM04503                  | 3 fibroblasts taken from individuals with Parkinson's disease, AG20443, AG08395 and AG08396 were pooled for this sample                                                                                                                                                           | skin                           | normal |
| GM04504                  | 3 adult twin pair fibroblasts, monozygotic twin of GM04504                                                                                                                                                                                                                        | skin                           | normal |
| HFF-Myc                  | 3 adult twin pair fibroblasts, monozygotic twin of GM04503, 13% of the cells examined show random chromosome loss                                                                                                                                                                 | foreskin                       | normal |
| HGF                      | 3 foreskin fibroblast cells expressing canine cMyc                                                                                                                                                                                                                                | gingiva                        | normal |
| HIFEpiC                  | 3 gingival fibroblasts                                                                                                                                                                                                                                                            | epithelium                     | normal |
| HWP                      | 3 iris pigment epithelial cells                                                                                                                                                                                                                                                   | adipose                        | normal |
| HWP_0092205              | 3 Undifferentiated White Preadipocytes from two individuals, HWP_0092205 and HWP_8120201.5, subcutaneous adipose tissue from abdomen / upper arm                                                                                                                                  | subcutaneous adipose tissue    | normal |
| Melano                   | 3 Undifferentiated White Preadipocytes from abdomen                                                                                                                                                                                                                               | skin                           | normal |
| FibroP_AG20443           | 3 epidermal melanocytes                                                                                                                                                                                                                                                           | skin fibroblast                | normal |
| HFL11W                   | 3 fibroblasts taken from individuals with Parkinson's disease                                                                                                                                                                                                                     | liver                          | normal |
| HFL24W                   | 3 fetal liver 11 weeks, consented fetal liver samples were isolated from legally aborted fetuses at 11 weeks gestation                                                                                                                                                            | liver                          | normal |
| HHSEC                    | 3 fetal liver 24 weeks, consented fetal liver samples were isolated from legally aborted fetuses at 24 weeks gestation                                                                                                                                                            | liver                          | normal |
| IPS_CWRU1                | 3 hepatic sinusoidal endothelial cells                                                                                                                                                                                                                                            | induced pluripotent cell (iPS) | normal |
| HMVEC-LBI                | 3 IPS cells derived from MSC658 fibroblast                                                                                                                                                                                                                                        | blood vessel                   | normal |
| HMVEC-Lly                | 3 blood microvascular endothelial cells, lung-derived                                                                                                                                                                                                                             | blood vessel                   | normal |
| TBEC                     | 3 lymphatic microvascular endothelial cells, lung-derived                                                                                                                                                                                                                         | epithelium                     | normal |
| BC_Testis_N30            | 3 trachea and bronchial epithelial cells from frush lung tissue provided by National Disease Research Interchange, passage 2 primary, non-immortalized cells, donor was 21 years old                                                                                              | testis                         | normal |
| HMEC                     | 3 testis, donor N30, age 41, Asian, DNA extract                                                                                                                                                                                                                                   | breast                         | normal |
| HMEpC                    | 3 mammary epithelial cells                                                                                                                                                                                                                                                        | mammary gland                  | normal |
| HMEpC_6022801.3          | 3 Mammary Epithelial Cells (placeholder, waiting on second lot/donor from PromoCell)                                                                                                                                                                                              | mammary gland                  | normal |
| Myometr                  | 3 Mammary Epithelial Cells                                                                                                                                                                                                                                                        | myometrium                     | normal |
| HMF                      | 3 myometrial cells                                                                                                                                                                                                                                                                | mammary                        | normal |
| PBMC                     | 3 mammary fibroblasts                                                                                                                                                                                                                                                             | blood                          | normal |
| HBVP                     | 3 peripheral blood mononuclear cells                                                                                                                                                                                                                                              | blood vessel                   | normal |
| BC_Bladder_01-11002      | 3 brain vascular pericytes                                                                                                                                                                                                                                                        | urinary bladder                | normal |
| BC_Uterus_BN0765         | 3 urinary bladder, donor 01-11002, age 83, caucasian, DNA extract                                                                                                                                                                                                                 | uterus                         | normal |
| BJ                       | 3 uterus, donor BN0765, age 44, Asian, DNA extract                                                                                                                                                                                                                                | skin                           | normal |
| HAEpiC                   | 3 skin fibroblast, "The line was established from skin taken from normal foreskin." - ATCC. (PMID: 9916803)                                                                                                                                                                       | epithelium                     | normal |
| BC_Leukocyte_UHN00204    | 3 amniotic epithelial cells                                                                                                                                                                                                                                                       | blood                          | normal |
| hMNC-CB_9111701.6        | 3 peripheral blood mononuclear cell, donor UHN00204, age 54, caucasian, DNA extract                                                                                                                                                                                               | blood                          | normal |
| hMNC-PB                  | 3 Mononuclear Cells, umbilical cord blood-single donor                                                                                                                                                                                                                            | blood                          | normal |
| hMNC-PB_0022330.9        | 3 Mononuclear Cells (peripheral blood-single donor) from two individuals, hMNC-PB_0022330.9 and hMNC-PB_0082430.9                                                                                                                                                                 | blood                          | normal |
| hMNC-PB_0082430.9        | 3 Mononuclear Cells, peripheral blood-single donor                                                                                                                                                                                                                                | blood                          | normal |
| Naive_B_cell             | 3 Mononuclear Cells, peripheral blood-single donor                                                                                                                                                                                                                                | tonsil                         | normal |
| HBMEC                    | 3 Naive B cells (IgD+) isolated from de-identified tonsillectomy                                                                                                                                                                                                                  | blood vessel                   | normal |
| HBVSMC                   | 3 brain microvascular endothelial cells                                                                                                                                                                                                                                           | blood vessel                   | normal |
| HCPEpiC                  | 3 brain vascular smooth muscle cells.                                                                                                                                                                                                                                             | epithelium                     | normal |
| BC_Leukocyte_UHN00204    | 3 choroid plexus epithelial cells                                                                                                                                                                                                                                                 | blood                          | normal |
| hMNC-CB                  | 3 peripheral blood mononuclear cell, donor UHN00204, age 54, caucasian, DNA extract                                                                                                                                                                                               | blood                          | normal |
| hMNC-CB_8072802.6        | 3 Mononuclear Cells (umbilical cord blood-single donor) from two individuals, hMNC-CB_9111701.6 and hMNC-CB_8072802.6                                                                                                                                                             | blood                          | normal |
| hMNC-CB_9111701.6        | 3 Mononuclear Cells, umbilical cord blood-single donor                                                                                                                                                                                                                            | blood                          | normal |
| hMNC-PB                  | 3 Mononuclear Cells, umbilical cord blood-single donor                                                                                                                                                                                                                            | blood                          | normal |
| hMNC-PB_0022330.9        | 3 Mononuclear Cells (peripheral blood-single donor) from two individuals, hMNC-PB_0022330.9 and hMNC-PB_0082430.9                                                                                                                                                                 | blood                          | normal |
| hMNC-PB_0082430.9        | 3 Mononuclear Cells, peripheral blood-single donor                                                                                                                                                                                                                                | blood vessel                   | normal |
| HUVEC                    | 2 umbilical vein endothelial cells                                                                                                                                                                                                                                                | skin                           | normal |
| AG04449                  | 3 fetal buttock/thigh fibroblast                                                                                                                                                                                                                                                  | gingival                       | normal |
| AG09319                  | 3 gum tissue fibroblasts from apparently healthy 24 year old                                                                                                                                                                                                                      | blood vessel                   | normal |
| AoAF                     | 3 aortic adventitial fibroblast cells                                                                                                                                                                                                                                             | blood vessel                   | normal |
| AoSMC                    | 3 aortic smooth muscle cells                                                                                                                                                                                                                                                      | adipose tissue                 | normal |
| BC_Adipose_UHN00001      | 3 adipose tissue, donor UHN0001, age 35, African American, DNA extract                                                                                                                                                                                                            | adrenal gland                  | normal |
| BC_Adrenal_Gland_H12803N | 3 adrenal gland, donor H12803N, age 88, caucasian, DNA extract                                                                                                                                                                                                                    | breast                         | normal |
| BC_Breast_02-03015       | 3 breast, donor 02-03015, age 21, caucasian, DNA extract                                                                                                                                                                                                                          | colon                          | normal |
| BC_Colon_01-11002        | 3 colon, donor 01-11002, age 83, caucasian, DNA and RNA extract                                                                                                                                                                                                                   | colon                          | normal |
| BC_Colon_H12817N         | 3 colon, donor H12817N, age 71, caucasian, DNA and RNA extract                                                                                                                                                                                                                    | colon                          | normal |

|                             |                                                                                                                                                                                                              |                             |        |
|-----------------------------|--------------------------------------------------------------------------------------------------------------------------------------------------------------------------------------------------------------|-----------------------------|--------|
| BC_Esophagus_01-11002       | 3 esophagus, donor 01-11002, age 83, caucasian, DNA and RNA extract                                                                                                                                          | esophagus                   | normal |
| BC_Esophagus_H12817N        | 3 esophagus, donor H12817N, age 71, caucasian, DNA extract                                                                                                                                                   | esophagus                   | normal |
| BC_Jejunum_H12817N          | 3 jejunum, donor H12817N, age 71, caucasian, DNA and RNA extract                                                                                                                                             | jejunum                     | normal |
| BC_Kidney_01-11002          | 3 kidney, donor 01-11002, age 83, caucasian, DNA and RNA extract                                                                                                                                             | kidney                      | normal |
| BC_Kidney_H12817N           | 3 kidney, donor H12817N, age 71, caucasian, DNA and RNA extract                                                                                                                                              | kidney                      | normal |
| BC_Left_Ventricle_N41       | 3 left ventricle, donor N41, age 26, Asian, DNA extract                                                                                                                                                      | left ventricle              | normal |
| BC_Liver_01-11002           | 3 liver, donor 01-11002, age 83, caucasian, DNA and RNA extract                                                                                                                                              | liver                       | normal |
| BC_Pancreas_H12817N         | 3 pancreas, donor H12817N, age 71, caucasian, DNA and RNA extract                                                                                                                                            | pancreas                    | normal |
| BC_Penis_H12817N            | 3 penis, donor H12817N, age 71, caucasian, DNA extract                                                                                                                                                       | penis                       | normal |
| BC_Pericardium_H12529N      | 3 pericardium, donor H12529N, age 70, caucasian, DNA extract                                                                                                                                                 | pericardium                 | normal |
| BC_Placenta_UHN00189        | 3 placenta, donor UHN00189, age 29                                                                                                                                                                           | placenta                    | normal |
| BC_Prostate_Gland_H12817N   | 3 prostate gland, donor H12817N, age 71, caucasian, DNA extract                                                                                                                                              | prostate gland              | normal |
| BC_Rectum_N29               | 3 rectum, donor N29, age 29, Asian, DNA extract                                                                                                                                                              | rectum                      | normal |
| BC_Skeletal_Muscle_01-11002 | 3 skeletal muscle, donor 01-11002, age 83, caucasian, DNA and RNA extract                                                                                                                                    | skeletal muscle             | normal |
| BC_Skeletal_Muscle_H12817N  | 3 skeletal muscle, donor H12817N, age 71, caucasian, DNA and RNA extract                                                                                                                                     | skeletal muscle             | normal |
| BC_Skin_01-11002            | 3 skin, donor 01-11002, age 83, caucasian, DNA extract                                                                                                                                                       | skin                        | normal |
| BC_Small_Intestine_01-11002 | 3 small intestine, donor 01-11002, age 83, caucasian, DNA and RNA extract                                                                                                                                    | small intestine             | normal |
| BC_Spleen_H12817N           | 3 spleen, donor H12817N, age 71, caucasian, DNA and RNA extract                                                                                                                                              | spleen                      | normal |
| BC_Stomach_01-11002         | 3 stomach, donor 01-11002, age 83, caucasian, DNA extract                                                                                                                                                    | stomach                     | normal |
| bone_marrow_HS27a           | HS27a Human Marrow Stromal Cells are fibroblastoid cells immortalized with HPV16 E6/E7 genes as described in Roecklein and Torok-Storb, 1995 Blood 85:997-1005, insert DNA is LXSN-16 E6E7 packaged in PA31. | bone marrow                 | normal |
| bone_marrow_H55             | H55 Human Marrow Stromal Cells are fibroblastoid cells immortalized with HPV16 E6/E7 genes as described in Roecklein and Torok-Storb, 1995 Blood 85:997-1005, insert DNA is LXSN-16 E6E7 packaged in PA31.   | bone marrow                 | normal |
| bone_marrow_MSC             | These cells are primary fibroblastoid cells obtained from human bone marrow of normal donors as described in Roecklein and Torok-Storb, 1995 Blood 85:997-1005.                                              | bone marrow                 | normal |
| Breast_OC                   | 3 Primary frozen breast tissue from NCTC donor IDs 11-0068A (Rep B1) and 11-0067A (Rep B2), both African American                                                                                            | breast                      | normal |
| Colon_BC                    | 3 colon, parent cell type to donors BC_01-11002 and BC_H12817N                                                                                                                                               | colon                       | normal |
| Colon_OC                    | 3 Primary frozen colon tissue from NCTC donor IDs 10-0005A (Rep B1) and 10-0170A (Rep B2), African American and caucasian                                                                                    | colon                       | normal |
| Esophagus_BC                | 3 esophagus, parental cell type to donors 01-11002 and H12817N                                                                                                                                               | esophagus                   | normal |
| Fibrobl                     | 3 child fibroblast                                                                                                                                                                                           | skin                        | normal |
| HAoAF                       | 3 Aortic Adventitial Fibroblasts from two individuals, HAoAF_6090101.11 and HAoAF_6111301.9 from tunica adventitia                                                                                           | blood vessel                | normal |
| HAoAF_6090101.11            | 3 Aortic Adventitial Fibroblasts from tunica adventitia                                                                                                                                                      | blood vessel                | normal |
| HAoAF_6111301.9             | 3 Aortic Adventitial Fibroblasts from tunica adventitia                                                                                                                                                      | blood vessel                | normal |
| HAoEC                       | 3 Aortic Endothelial Cells (thoracic) from two individuals, HAoEC_7071706.1 and HAoEC_8061102.1                                                                                                              | blood vessel                | normal |
| HAoEC_7071706.1             | 3 Aortic Endothelial Cells                                                                                                                                                                                   | blood vessel                | normal |
| HAoEC_8061102.1             | 3 Aortic Endothelial Cells from thoracic                                                                                                                                                                     | blood vessel                | normal |
| HCF                         | 3 cardiac fibroblasts                                                                                                                                                                                        | heart                       | normal |
| HCFaa                       | 3 cardiac fibroblasts- adult atrial                                                                                                                                                                          | heart                       | normal |
| HCH                         | 3 Undifferentiated Chondrocytes from two individuals, HCH_8100808.2 and HCH_0011308.2P from knee joint                                                                                                       | cartilage                   | normal |
| HCH_0011308.2P              | 3 Undifferentiated Chondrocytes from knee joint                                                                                                                                                              | cartilage                   | normal |
| HCH_8100808.2               | 3 Undifferentiated Chondrocytes from knee joint                                                                                                                                                              | cartilage                   | normal |
| HCM                         | 3 cardiac myocytes                                                                                                                                                                                           | heart                       | normal |
| Heart_OC                    | 3 Primary frozen heart tissue from NICHD donor IDs 1104 (Rep B1 DNase), 602 (Rep B2 DNase), 1442 (Rep B3 DNase), 1863 (Rep B1 FAIRE), 4548 (Rep B2 FAIRE)                                                    | heart                       | normal |
| Heart_STL003                | 3 Standard procurement of heart tissue from a 34 year old caucasian male.                                                                                                                                    | heart                       | normal |
| HEEpiC                      | 3 esophageal epithelial cells                                                                                                                                                                                | epithelium                  | normal |
| Hepatocytes                 | 3 primary hepatocytes, liver perfused by enzymes to generate single cell suspension                                                                                                                          | liver                       | normal |
| HFDPC                       | 3 Follicle Dermal Papilla Cells from two individuals, HFDPC_0100503.2 and HFDPC_0102703.3 from lateral scalp (brown, blond)                                                                                  | skin                        | normal |
| HFDPC_0100503.2             | 3 Follicle Dermal Papilla Cells from lateral scalp (brown)                                                                                                                                                   | skin                        | normal |
| HFDPC_0102703.3             | 3 Follicle Dermal Papilla Cells from lateral scalp (blond)                                                                                                                                                   | skin                        | normal |
| HFF                         | 3 foreskin fibroblast                                                                                                                                                                                        | foreskin                    | normal |
| hMSC-AT                     | 3 Undifferentiated Mesenchymal Stem Cells from two individuals, hMSC-AT_9061601.12 and hMSC-AT_0102604.12 from subcutaneous abdomen adipose tissue                                                           | adipose                     | normal |
| hMSC-AT_0102604.12          | 3 Undifferentiated Mesenchymal Stem Cells from subcutaneous abdomen adipose tissue                                                                                                                           | adipose                     | normal |
| hMSC-AT_9061601.12          | 3 Undifferentiated Mesenchymal Stem Cells from abdomen                                                                                                                                                       | subcutaneous adipose tissue | normal |
| hMSC-BM                     | 3 Undifferentiated Mesenchymal Stem Cells from two individuals, hMSC-BM_0050602.11 and hMSC-BM_0051105.11 from femoral head                                                                                  | bone marrow                 | normal |
| hMSC-BM_0050602.11          | 3 Undifferentiated Mesenchymal Stem Cells from femoral head                                                                                                                                                  | bone marrow                 | normal |
| hMSC-BM_0051105.11          | 3 Undifferentiated Mesenchymal Stem Cells from femoral head                                                                                                                                                  | bone marrow                 | normal |
| hMSC-UC                     | 3 Undifferentiated Mesenchymal Stem Cells from two individuals, hMSC-UC_0081101.7 and hMSC-UC_0052501.7 from matrix (Wharton's Jelly)                                                                        | umbilical cord              | normal |
| hMSC-UC_0052501.7           | 3 Undifferentiated Mesenchymal Stem Cells from matrix (Wharton's Jelly)                                                                                                                                      | umbilical cord              | normal |
| hMSC-UC_0081101.7           | 3 Undifferentiated Mesenchymal Stem Cells from matrix (Wharton's Jelly)                                                                                                                                      | umbilical cord              | normal |
| HMVEC-dAd                   | 3 adult dermal microvascular endothelial cells.                                                                                                                                                              | blood vessel                | normal |
| HMVEC-dBI-Ad                | 3 adult blood microvascular endothelial cells, dermal-derived                                                                                                                                                | blood vessel                | normal |
| HMVEC-dBI-Neo               | 3 neonatal blood microvascular endothelial cells, dermal-derived                                                                                                                                             | blood vessel                | normal |
| HMVEC-dLy-Ad                | 3 adult lymphatic microvascular endothelial cells, dermal-derived                                                                                                                                            | blood vessel                | normal |
| HMVEC-dLy-Neo               | 3 neonatal lymphatic microvascular endothelial cells, dermal-derived                                                                                                                                         | blood vessel                | normal |

|                     |                                                                                                                                                                                                                                                                                                                                                            |                                |        |
|---------------------|------------------------------------------------------------------------------------------------------------------------------------------------------------------------------------------------------------------------------------------------------------------------------------------------------------------------------------------------------------|--------------------------------|--------|
| HMVEC-dNeo          | 3 neonatal microvascular endothelial cells (single donor), dermal-derived                                                                                                                                                                                                                                                                                  | blood vessel                   | normal |
| HNPCepiC            | 3 non-pigment ciliary epithelial cells                                                                                                                                                                                                                                                                                                                     | epithelium                     | normal |
| HOB                 | 3 Undifferentiated Osteoblasts from two individuals, HOB_0090202.1 and HOB_0091301 from femoral head                                                                                                                                                                                                                                                       | cancellous bone                | normal |
| HOB_0090202.1       | 3 Undifferentiated Osteoblasts from femoral head                                                                                                                                                                                                                                                                                                           | cancellous bone                | normal |
| HOB_0091301         | 3 Undifferentiated Osteoblasts from femoral head                                                                                                                                                                                                                                                                                                           | cancellous bone                | normal |
| HPAEC               | 3 pulmonary artery endothelial cells.                                                                                                                                                                                                                                                                                                                      | blood vessel                   | normal |
| HPAEPiC             | 3 pulmonary alveolar epithelial cells                                                                                                                                                                                                                                                                                                                      | epithelium                     | normal |
| HPAF                | 3 pulmonary artery fibroblasts                                                                                                                                                                                                                                                                                                                             | blood vessel                   | normal |
| HPDE6-E6E7          | 3 pancreatic duct cells immortalized with E6E7 gene of HPV                                                                                                                                                                                                                                                                                                 | pancreatic duct                | normal |
| HPdLF               | 3 periodontal ligament fibroblasts                                                                                                                                                                                                                                                                                                                         | epithelium                     | normal |
| HPiEpC              | 3 Placental Epithelial Cells amniotic membrane                                                                                                                                                                                                                                                                                                             | placenta                       | normal |
| HPiEpC_9012801.2    | 3 Placental Epithelial Cells amniotic membrane                                                                                                                                                                                                                                                                                                             | placenta                       | normal |
| HPiEpC_9041503.2    | 3 Placental Epithelial Cells amniotic membrane                                                                                                                                                                                                                                                                                                             | placenta                       | normal |
| HRCEpiC             | 3 renal cortical epithelial cells                                                                                                                                                                                                                                                                                                                          | epithelium                     | normal |
| HRE                 | 3 renal epithelial cells                                                                                                                                                                                                                                                                                                                                   | epithelium                     | normal |
| HRGEC               | 3 renal glomerular endothelial cells                                                                                                                                                                                                                                                                                                                       | kidney                         | normal |
| HRPEpiC             | 3 retinal pigment epithelial cells                                                                                                                                                                                                                                                                                                                         | epithelium                     | normal |
| HSaVEC              | 3 Saphenous Vein Endothelial Cells from two individuals, HSaVEC_9100101.15 and HSaVEC_0022202.16 from thigh                                                                                                                                                                                                                                                | blood vessel                   | normal |
| HSaVEC_0022202.16   | 3 Saphenous Vein Endothelial Cells from thigh                                                                                                                                                                                                                                                                                                              | blood vessel                   | normal |
| HSaVEC_9100101.15   | 3 Saphenous Vein Endothelial Cells from thigh                                                                                                                                                                                                                                                                                                              | blood vessel                   | normal |
| HSMM                | 3 skeletal muscle myoblasts                                                                                                                                                                                                                                                                                                                                | muscle                         | normal |
| HSMMtube            | 3 skeletal muscle myotubes differentiated from the HSMM cell line                                                                                                                                                                                                                                                                                          | muscle                         | normal |
| HTR8svn             | 3 trophoblast (HTR-8/SVneo) cell line, a thin layer of ectoderm that forms the wall of many mammalian blastulas and functions in the nutrition and implantation of the embryo                                                                                                                                                                              | blastula                       | normal |
| HVMF                | 3 villous mesenchymal fibroblast cells                                                                                                                                                                                                                                                                                                                     | connective                     | normal |
| HVMF_6091203.3      | 3 Villous Mesenchymal Fibroblasts from villous tissue                                                                                                                                                                                                                                                                                                      | placenta                       | normal |
| HVMF_6100401.3      | 3 Villous Mesenchymal Fibroblasts from villous tissue                                                                                                                                                                                                                                                                                                      | placenta                       | normal |
| HWP_8120201.5       | 3 Undifferentiated White Preadipocytes from upper arm                                                                                                                                                                                                                                                                                                      | subcutaneous adipose tissue    | normal |
| IPS_hFib2_IPS4      | 3 induced pluripotent stem cell line 4 derived from skin fibroblast of a 30 year old donor, same donor as iPS_hFib2_IPS5                                                                                                                                                                                                                                   | induced pluripotent cell (iPS) | normal |
| IPS_hFib2_IPS5      | 3 induced pluripotent stem cell line 5 derived from skin fibroblast of a 30 year old donor, same donor as iPS_hFib2_IPS4                                                                                                                                                                                                                                   | induced pluripotent cell (iPS) | normal |
| Kidney_BC           | 3 kidney, parental cell type to donors 01-11002 and H12817N                                                                                                                                                                                                                                                                                                | kidney                         | normal |
| Kidney_OC           | 3 Primary frozen kidney tissue from NICHD donor IDs 1104 (Rep B1 DNase), 602 (Rep B2 DNase), 1442 (Rep B3 DNase), 1863 (Rep B3 FAIRE) and NCTC donor ID 10-0022A (Rep B1 FAIRE)                                                                                                                                                                            | kidney                         | normal |
| LHSR                | 3 prostate epithelial cells (PrEC), multiple human donors, all of whom are HIV-1, Hepatitis B and Hepatitis C negative, treatment: to create LHSR, cells were infected with amphotropic retroviruses encoding the SV40 large T antigen (L), the telomerase catalytic subunit hTERT (H), the SV40 small T antigen (S) and an oncogenic allele of H-ras (R). | epithelium                     | normal |
| Liver_OC            | 3 Primary frozen liver tissue from NICHD donor IDs 1104 (Rep B1), 602 (Rep B2), 1442 (Rep B3)                                                                                                                                                                                                                                                              | liver                          | normal |
| Liver_STL004        | 3 Primary liver tissue from the right portion of a standard liver procurement from a 6 year old female.                                                                                                                                                                                                                                                    | liver                          | normal |
| Liver_STL011        | 3 Primary liver tissue of a standard liver procurement from a 36 year old caucasian male.                                                                                                                                                                                                                                                                  | liver                          | normal |
| NHBE                | 3 bronchial epithelial cells                                                                                                                                                                                                                                                                                                                               | epithelium                     | normal |
| NHBE_RA             | 3 bronchial epithelial cells with retinoic acid                                                                                                                                                                                                                                                                                                            | bronchial epithelium           | normal |
| NHDF                | 3 Dermal Fibroblasts from temple / breast                                                                                                                                                                                                                                                                                                                  | skin                           | normal |
| NHDF-Ad             | 3 adult dermal fibroblasts                                                                                                                                                                                                                                                                                                                                 | skin                           | normal |
| NHDF-neo            | 3 neonatal dermal fibroblasts                                                                                                                                                                                                                                                                                                                              | skin                           | normal |
| NHDF_0060801.3      | 3 Dermal Fibroblasts from temple                                                                                                                                                                                                                                                                                                                           | skin                           | normal |
| NHDF_7071701.2      | 3 Dermal Fibroblasts from breast                                                                                                                                                                                                                                                                                                                           | skin                           | normal |
| NHEK                | 3 epidermal keratinocytes                                                                                                                                                                                                                                                                                                                                  | skin                           | normal |
| NHEM.f_M2           | 3 Epidermal Melanocytes from two individuals, NHEM.f_M2_5071302.2 and NHEM.f_M2_6022001 from foreskin                                                                                                                                                                                                                                                      | skin                           | normal |
| NHEM.f_M2_5071302.2 | 3 Epidermal Melanocytes (foreskin)                                                                                                                                                                                                                                                                                                                         | skin                           | normal |
| NHEM.f_M2_6022001   | 3 Epidermal Melanocytes (foreskin)                                                                                                                                                                                                                                                                                                                         | skin                           | normal |
| NHEM_M2             | 3 Epidermal Melanocytes (adult) from two individuals, NHEM_M2_7011001.2 and NHEM_M2_7012303 from cheek / temple                                                                                                                                                                                                                                            | skin                           | normal |
| NHEM_M2_7011001.2   | 3 Epidermal Melanocytes (adult) from cheek                                                                                                                                                                                                                                                                                                                 | skin                           | normal |
| NHEM_M2_7012303     | 3 Epidermal Melanocytes (adult) from temple                                                                                                                                                                                                                                                                                                                | skin                           | normal |
| Olf_neurosphere     | 3 Human olfactory neurosphere-derived cells from mucosal biopsies                                                                                                                                                                                                                                                                                          | Nasal biopsy                   | normal |
| Osteobl             | 3 osteoblasts (NH0st)                                                                                                                                                                                                                                                                                                                                      | bone                           | normal |
| Pancreas_OC         | 3 Primary frozen pancreas tissue from NCTC donor IDs 09-0144A (Rep B1) and 10-0021A (Rep B2)                                                                                                                                                                                                                                                               | pancreas                       | normal |
| PanIslets           | 3 pancreatic islets from 2 donors, the sources of these primary cells are cadavers from National Disease Research Interchange (NDRI) and another sample isolated as in Bucher, P. et al., Assessment of a novel two-component enzyme preparation for human islet isolation and transplantation. Transplantation 79, 917 (2005)                             | pancreas                       | normal |
| PBDEFetal           | 3 peripheral blood-derived erythroblasts from 16-19 week human fetal liver                                                                                                                                                                                                                                                                                 | liver                          | normal |
| PrEC                | 3 prostate epithelial cell line                                                                                                                                                                                                                                                                                                                            | prostate                       | normal |
| Prostate_OC         | 3 Primary frozen prostate tissue from NICHD donor IDs 1669 (Rep B1) and 1540 (Rep B2)                                                                                                                                                                                                                                                                      | prostate                       | normal |
| Psoas_muscle_OC     | 3 Primary frozen psoas muscle tissue from NICHD donor IDs 1104 (Rep B1 DNase), 602 (Rep B2 DNase), 1442 (Rep B3 DNase), 1540 (Rep B1), 1863 (Rep B2 FAIRE)                                                                                                                                                                                                 | psoas muscle                   | normal |
| RPTEC               | 3 renal proximal tubule epithelial cells                                                                                                                                                                                                                                                                                                                   | epithelium                     | normal |
| RWPE1               | 3 prostate epithelial                                                                                                                                                                                                                                                                                                                                      | prostate                       | normal |

|                       |                                                                                                                                                                                                                                                                                                          |                                |        |
|-----------------------|----------------------------------------------------------------------------------------------------------------------------------------------------------------------------------------------------------------------------------------------------------------------------------------------------------|--------------------------------|--------|
| SAEC                  | 3 small airway epithelial cells                                                                                                                                                                                                                                                                          | epithelium                     | normal |
| Skeletal_Muscle_BC    | 3 skeletal muscle, parental cell type to donors 01-11002 and H12817N                                                                                                                                                                                                                                     | skeletal muscle                | normal |
| SkMC                  | 3 Skeletal Striated Muscle Cells from two individuals, SkMC_9011302 SkMC_8121902.17 from M. pectoralis / Mm. intercostales                                                                                                                                                                               | muscle                         | normal |
| SkMC                  | 3 skeletal muscle cells                                                                                                                                                                                                                                                                                  | muscle                         | normal |
| SkMC_8121902.17       | 3 Skeletal Muscle Cells from Mm. intercostales                                                                                                                                                                                                                                                           | striated muscle                | normal |
| SkMC_9011302          | 3 Skeletal Muscle Cells from M. pectoralis                                                                                                                                                                                                                                                               | striated muscle                | normal |
| Small_intestine_OC    | 3 Primary frozen small intestine tissue from NCTC donor IDs 10-0063A (Rep B1) and 09-0143A (Rep B2)                                                                                                                                                                                                      | small intestine                | normal |
| Spleen_OC             | 3 Primary frozen spleen tissue from NICHD donor IDs 1863 (Rep B1) and 4548 (Rep B2)                                                                                                                                                                                                                      | spleen                         | normal |
| Stellate              | 3 hepatic stellate cells, liver that was perfused with collagenase and selected for hepatic stellate cells by density gradient                                                                                                                                                                           | liver                          | normal |
| Stomach_BC            | 3 stomach, parental cell type to donors 01-11002 and H12817N                                                                                                                                                                                                                                             | stomach                        | normal |
| Urothelia             | 3 primary ureter cell culture of urothelial cells derived from a 12 year-old girl and immortalized by transfection with a temperature-sensitive SV-40 large T antigen gene                                                                                                                               | urothelium                     | normal |
| Decidua               | 3 decidua cells (part of the mucous membrane lining uterus), Fetal membranes were collected from women who underwent planned cesarean delivery at term, before labor and without rupture of membranes                                                                                                    | cervix                         | normal |
| HAL                   | 3 adult liver, genomic DNA purified from surgically excised adult human liver                                                                                                                                                                                                                            | liver                          | normal |
| Fibrop_AG08395        | 3 fibroblasts taken from individuals with Parkinson's disease                                                                                                                                                                                                                                            | skin fibroblast                | normal |
| CD34+_Mobilized       | 3 hematopoietic progenitor cells- mobilized, from donor R001679.                                                                                                                                                                                                                                         | blood                          | normal |
| CD34+_Mobilized       | 3 hematopoietic progenitor cells- mobilized, from donor R001679.                                                                                                                                                                                                                                         | blood                          | normal |
| LHCN-M2               | 2 skeletal myoblasts derived from satellite cells from the pectoralis major muscle of a 41 year old caucasian heart transplant donor, immortalized with lox-hygro-tERT ("LH"), and Cdk4-neo ("CN"), Zhu et al. (2007) in Aging Cell, vol. 6, pp 515-523, newly promoted to tier 2: not in 2011 analysis. | skeletal muscle myoblast       | normal |
| Chorion               | 3 chorion cells (outermost of two fetal membranes), fetal membranes were collected from women who underwent planned cesarean delivery at term, before labor and without rupture of membranes.                                                                                                            | fetal membrane                 | normal |
| HConF                 | 3 conjunctival fibroblast                                                                                                                                                                                                                                                                                | eye                            | normal |
| HEK293                | 3 embryonic kidney, cells contain Adenovirus 5 DNA (PMID: 11967234)                                                                                                                                                                                                                                      | kidney                         | normal |
| HEK293-T-REx          | 3 embryonic kidney cells transformed with Adenovirus 5 DNA stably expressing tetracycline repressor, HEK293 (ATCC number CRL-1573) is the parental cell line,                                                                                                                                            | kidney                         | normal |
| HEK293T               | 3 hypotriploid, XXX                                                                                                                                                                                                                                                                                      | kidney                         | normal |
| HEK293T               | 3 embryonic kidney that expresses SV40 large T antigen, HEK293 (ATCC number CRL-1573) is the parental cell line                                                                                                                                                                                          | kidney                         | normal |
| HSMM_emb              | 3 embryonic myoblast                                                                                                                                                                                                                                                                                     | muscle                         | normal |
| HSMM_FSHD             | 3 primary myoblast from Facioscapulohumeral Muscular Dystrophy (FSHD) patients, muscle needle biopsies                                                                                                                                                                                                   | muscle                         | normal |
| HSMMtube_emb          | 3 embryonic myotube                                                                                                                                                                                                                                                                                      | muscle                         | normal |
| HSMMtube_FSHD         | 3 myotube from Facioscapulohumeral Muscular Dystrophy (FSHD) patient, muscle needle biopsies                                                                                                                                                                                                             | muscle                         | normal |
| IPS                   | 3 induced pluripotent stem cell derived from skin fibroblast                                                                                                                                                                                                                                             | induced pluripotent stem cell  | normal |
| IPS_NIH11             | 3 iPS cells derived from AG20443 fibroblast                                                                                                                                                                                                                                                              | induced pluripotent cell (iPS) | normal |
| IPS_NIH17             | 3 iPS cells derived from AG08395 fibroblast                                                                                                                                                                                                                                                              | induced pluripotent cell (iPS) | normal |
| Ishikawa              | 3 endometrial adenocarcinoma                                                                                                                                                                                                                                                                             | uterus                         | normal |
| MCF10A-Er-Src         | 3 mammary gland, non-tumorigenic epithelial, inducible cell line, derived from the MCF-10A parental cells and contain ER-Src, a derivative of the Src kinase oncoprotein (v-Src) that is fused to the ligand-binding domain of the estrogen receptor (ER)                                                | breast                         | normal |
| PanIsletD             | 3 dedifferentiated human pancreatic islets from the National Disease Research Interchange (NDRI), same source as PanIslets                                                                                                                                                                               | pancreas                       | normal |
| PBDE                  | 3 peripheral blood-derived erythroblasts                                                                                                                                                                                                                                                                 | blood                          | normal |
| pHTE                  | 3 primary tracheal epithelial cells                                                                                                                                                                                                                                                                      | epithelium                     | normal |
| ProgFib               | 3 fibroblasts, Hutchinson-Gilford progeria syndrome (cell line HGPS, HGADFN167, progeria research foundation)                                                                                                                                                                                            | skin                           | normal |
| prostate              | 3 prostate tissue purchased for CSHL project                                                                                                                                                                                                                                                             | prostate                       | normal |
| BC_Leukocyte_UHN00204 | 3 peripheral blood mononuclear cell, donor UHN00204, age 54, caucasian, DNA extract                                                                                                                                                                                                                      | blood                          | normal |
| hMNC-CB               | 3 Mononuclear Cells (umbilical cord blood-single donor) from two individuals, hMNC-CB_9111701.6 and hMNC-CB_8072802.6                                                                                                                                                                                    | blood                          | normal |
| hMNC-CB_8072802.6     | 3 Mononuclear Cells, umbilical cord blood-single donor                                                                                                                                                                                                                                                   | blood                          | normal |
| hMNC-CB_9111701.6     | 3 Mononuclear Cells, umbilical cord blood-single donor                                                                                                                                                                                                                                                   | blood                          | normal |
| hMNC-PB               | 3 Mononuclear Cells (peripheral blood-single donor) from two individuals, hMNC-PB_0022330.9 and hMNC-PB_0082430.9                                                                                                                                                                                        | blood                          | normal |
| hMNC-PB_0022330.9     | 3 Mononuclear Cells, peripheral blood-single donor                                                                                                                                                                                                                                                       | blood                          | normal |
| hMNC-PB_0082430.9     | 3 Mononuclear Cells, peripheral blood-single donor                                                                                                                                                                                                                                                       | blood                          | normal |
| CD34+_Mobilized       | 3 hematopoietic progenitor cells- mobilized, from donor R001679.                                                                                                                                                                                                                                         | blood                          | normal |
| PBMC                  | 3 peripheral blood mononuclear cells                                                                                                                                                                                                                                                                     | blood                          | normal |
| Adult_CD4_naive       | 3 CD4+ cells isolated from human blood and enriched for naive populations                                                                                                                                                                                                                                | blood                          | normal |
| Adult_CD4_Th0         | 3 CD4+ cells isolated from human blood and enriched for Th0 populations                                                                                                                                                                                                                                  | blood                          | normal |
| CD4+_Naive_Wb11970640 | 3 CD4+ naive sorted cells, donor is Caucasian, male 26 year old, primary pheresis of single normal subject                                                                                                                                                                                               | blood                          | normal |
| CD4+_Naive_Wb78495824 | 3 CD4+ naive sorted cells, donor is Caucasian, female 35 year old, primary pheresis of single normal subject                                                                                                                                                                                             | blood                          | normal |
| Cord_CD4_naive        | 3 CD4+ cells isolated from cord blood and enriched for naive populations                                                                                                                                                                                                                                 | blood                          | normal |
| Cord_CD4_Th0          | 3 CD4+ cells isolated from cord blood and enriched for Th0 populations                                                                                                                                                                                                                                   | blood                          | normal |
| Adult_CD4_Th1         | 3 CD4+ cells isolated from human blood and enriched for Th1 populations                                                                                                                                                                                                                                  | blood                          | normal |
| Cord_CD4_Th1          | 3 CD4+ cells isolated from cord blood and enriched for Th1 populations                                                                                                                                                                                                                                   | blood                          | normal |
| Th1_Wb54553204        | 3 Th1 cells in vivo isolation, donor is Caucasian, male 33 year old, primary pheresis of single normal subject                                                                                                                                                                                           | blood                          | normal |
| Th1                   | 3 primary Th1 T cells                                                                                                                                                                                                                                                                                    | blood                          | normal |
| Th17                  | 3 T helper cells expressing IL-17, primary pheresis of single normal subject                                                                                                                                                                                                                             | blood                          | normal |
| Th2_Wb33676984        | 3 Th2 cells in vivo isolation, donor is Asian, female 26 year old, primary pheresis of single normal subject                                                                                                                                                                                             | blood                          | normal |
| Th2_Wb54553204        | 3 Th2 cells in vivo isolation, donor is Caucasian, male 33 year old, primary pheresis of single normal subject                                                                                                                                                                                           | blood                          | normal |
| Th2                   | 3 primary Th2 T cells                                                                                                                                                                                                                                                                                    | blood                          | normal |
| Treg_Wb83319432       | 3 T regulatory cells in vivo isolation, donor is Caucasian, male 28 year old, primary pheresis of single normal subject                                                                                                                                                                                  | blood                          | normal |

| Key                      |                                                           |
|--------------------------|-----------------------------------------------------------|
| cell_Line_name           | Cell line name                                            |
| ENCODE_Tier              | ENCODE tier (phase)                                       |
| Description              | Description of ENCODE cell line                           |
| Tissue                   | Tissue or cell type                                       |
| Karyotype                | Karyotype (Normal or cancer)                              |
| Cell Bucket for analysis | Major cell type associated to cell line for this analysis |
| B:                       | B cells                                                   |
| T:                       | T cells                                                   |
| M:                       | Monocytes/macrophages                                     |
| O:                       | Other                                                     |
| L:                       | Lung                                                      |

Supplementary Table 5. Epigenomic Roadmap Project cells used in this analysis

| Standardized Epigenome name                             | Epigenome name (from EDACC Release 9 directory)        | ANATOMY      | TYPE            | Cell Bucket for Analysis |
|---------------------------------------------------------|--------------------------------------------------------|--------------|-----------------|--------------------------|
| Primary B cells from cord blood                         | CD19_Primary_Cells_Cord_BI                             | BLOOD        | PrimaryCell     | B                        |
| Primary B cells from peripheral blood                   | CD19_Primary_Cells_Peripheral_UW                       | BLOOD        | PrimaryCell     | B                        |
| GM12878 Lymphoblastoid Cell Line                        | GM12878_Lymphoblastoid                                 | BLOOD        | CellLine        | B                        |
| Brain Cingulate Gyrus                                   | Brain_Cingulate_Gyrus                                  | BRAIN        | PrimaryTissue   | C                        |
| Brain Dorsolateral Prefrontal Cortex                    | Brain_Dorsolateral_Prefrontal_Cortex                   | BRAIN        | PrimaryTissue   | C                        |
| Brain Germinal Matrix                                   | Brain_Germinal_Matrix                                  | BRAIN        | PrimaryTissue   | C                        |
| Brain Hippocampus Middle                                | Brain_Hippocampus_Middle                               | BRAIN        | PrimaryTissue   | C                        |
| Brain Inferior Temporal Lobe                            | Brain_Inferior_Temporal_Lobe                           | BRAIN        | PrimaryTissue   | C                        |
| Brain Substantia Nigra                                  | Brain_Substantia_Nigra                                 | BRAIN        | PrimaryTissue   | C                        |
| Cortex derived primary cultured neurospheres            | Neurosphere_Cultured_Cells_Cortex_Derived              | BRAIN        | PrimaryCell     | C                        |
| Fetal Brain Female                                      | Fetal_Brain_Female                                     | BRAIN        | PrimaryTissue   | C                        |
| Brain Angular Gyrus                                     | Brain_Angular_Gyrus                                    | BRAIN        | PrimaryTissue   | C                        |
| Brain Anterior Caudate                                  | Brain_Anterior_Caudate                                 | BRAIN        | PrimaryTissue   | C                        |
| Fetal Brain Male                                        | Fetal_Brain_Male                                       | BRAIN        | PrimaryTissue   | C                        |
| Ganglion Eminence derived primary cultured neurospheres | Neurosphere_Cultured_Cells_Ganglionic_Eminence_Derived | BRAIN        | PrimaryCell     | C                        |
| H9 Derived Neuronal Progenitor Cultured Cells           | H9_Derived_Neuronal_Progenitor_Cultured_Cells          | ESC_DERIVED  | CellLineDerived | C                        |
| H1 Derived Neuronal Progenitor Cultured Cells           | H1_Derived_Neuronal_Progenitor_Cultured_Cells          | ESC_DERIVED  | CellLineDerived | C                        |
| H9 Derived Neuron Cultured Cells                        | H9_Derived_Neuron_Cultured_Cells                       | ESC_DERIVED  | CellLineDerived | C                        |
| H1 Derived Mesenchymal Stem Cells                       | H1_Derived_Mesenchymal_Stem_Cells                      | ESC_DERIVED  | CellLineDerived | L                        |
| IMR90 fetal lung fibroblasts Cell Line                  | IMR90_Cell_Line                                        | LUNG         | CellLine        | L                        |
| NHLF Lung Fibroblast Primary Cells                      | NHLF_Lung_Fibroblasts                                  | LUNG         | PrimaryCell     | L                        |
| Fetal Lung                                              | Fetal_Lung                                             | LUNG         | PrimaryTissue   | L                        |
| Lung                                                    | Lung                                                   | LUNG         | PrimaryTissue   | L                        |
| Monocytes-CD14+ RO01746 Primary Cells                   | Monocytes-CD14+ RO01746                                | BLOOD        | PrimaryCell     | M                        |
| Primary monocytes from peripheral blood                 | CD14_Primary_Cells                                     | BLOOD        | PrimaryCell     | M                        |
| Fetal Adrenal Gland                                     | Fetal_Adrenal_Gland                                    | ADRENAL      | PrimaryTissue   | O                        |
| Primary hematopoietic stem cells                        | CD34_Primary_Cells                                     | BLOOD        | PrimaryCell     | O                        |
| Primary hematopoietic stem cells G-CSF-mobilized Female | Mobilized_CD34_Primary_Cells_Female                    | BLOOD        | PrimaryCell     | O                        |
| Primary hematopoietic stem cells G-CSF-mobilized Male   | Mobilized_CD34_Primary_Cells_Male                      | BLOOD        | PrimaryCell     | O                        |
| Primary hematopoietic stem cells short term culture     | CD34_Cultured_Cells                                    | BLOOD        | PrimaryCell     | O                        |
| Primary mononuclear cells from peripheral blood         | Peripheral_Blood_Mononuclear_Primary_Cells             | BLOOD        | PrimaryCell     | O                        |
| Primary neutrophils from peripheral blood               | CD15_Primary_Cells                                     | BLOOD        | PrimaryCell     | O                        |
| Osteoblast Primary Cells                                | Osteoblasts                                            | BONE         | PrimaryCell     | O                        |
| Breast Myoepithelial Primary Cells                      | Breast_Myoepithelial_Cells                             | BREAST       | PrimaryCell     | O                        |
| Breast variant Human Mammary Epithelial Cells (vHMEC)   | Breast_vHMEC                                           | BREAST       | PrimaryCell     | O                        |
| HMEC Mammary Epithelial Primary Cells                   | HMEC_Mammary_Epithelial                                | BREAST       | PrimaryCell     | O                        |
| HUES6 Cell Line                                         | HUES6_Cell_Line                                        | ESC          | CellLine        | O                        |
| ES-UCSF4 Cell Line                                      | 4star                                                  | ESC          | CellLine        | O                        |
| ES-13 Cell Line                                         | ES-13_Cell_Line                                        | ESC          | CellLine        | O                        |
| ES-WA7 Cell Line                                        | ES-WA7_Cell_Line                                       | ESC          | CellLine        | O                        |
| H1 Cell Line                                            | H1_Cell_Line                                           | ESC          | CellLine        | O                        |
| H9 Cell Line                                            | H9_Cell_Line                                           | ESC          | CellLine        | O                        |
| HUES48 Cell Line                                        | HUES48_Cell_Line                                       | ESC          | CellLine        | O                        |
| HUES64 Cell Line                                        | HUES64_Cell_Line                                       | ESC          | CellLine        | O                        |
| H1 BMP4 Derived Mesendoderm Cultured Cells              | H1_BMP4_Derived_Mesendoderm_Cultured_Cells             | ESC_DERIVED  | CellLineDerived | O                        |
| H1 BMP4 Derived Trophoblast Cultured Cells              | H1_BMP4_Derived_Trophoblast_Cultured_Cells             | ESC_DERIVED  | CellLineDerived | O                        |
| hESC Derived CD184+ Endoderm Cultured Cells             | hESC_Derived_CD184+_Endoderm_Cultured_Cells            | ESC_DERIVED  | CellLineDerived | O                        |
| hESC Derived CD56+ Ectoderm Cultured Cells              | hESC_Derived_CD56+_Ectoderm_Cultured_Cells             | ESC_DERIVED  | CellLineDerived | O                        |
| hESC Derived CD56+ Mesoderm Cultured Cells              | hESC_Derived_CD56+_Mesoderm_Cultured_Cells             | ESC_DERIVED  | CellLineDerived | O                        |
| Adipose Derived Mesenchymal Stem Cell Cultured Cells    | Adipose_Derived_Mesenchymal_Stem_Cell_Cultured_Cells   | FAT          | PrimaryCell     | O                        |
| Adipose Nuclei                                          | Adipose_Nuclei                                         | FAT          | PrimaryTissue   | O                        |
| Mesenchymal Stem Cell Derived Adipocyte Cultured Cells  | Mesenchymal_Stem_Cell_Derived_Adipocyte_Cultured_Cells | FAT          | CellLineDerived | O                        |
| Colon Smooth Muscle                                     | Colon_Smooth_Muscle                                    | GI_COLON     | PrimaryTissue   | O                        |
| Colonic Mucosa                                          | Colonic_Mucosa                                         | GI_COLON     | PrimaryTissue   | O                        |
| Sigmoid Colon                                           | Sigmoid_Colon                                          | GI_COLON     | PrimaryTissue   | O                        |
| Duodenum Mucosa                                         | Duodenum_Mucosa                                        | GI_DUODENUM  | PrimaryTissue   | O                        |
| Duodenum Smooth Muscle                                  | Duodenum_Smooth_Muscle                                 | GI_DUODENUM  | PrimaryTissue   | O                        |
| Esophagus                                               | Esophagus                                              | GI_ESOPHAGUS | PrimaryTissue   | O                        |
| Fetal Intestine Large                                   | Fetal_Intestine_Large                                  | GI_INTESTINE | PrimaryTissue   | O                        |
| Fetal Intestine Small                                   | Fetal_Intestine_Small                                  | GI_INTESTINE | PrimaryTissue   | O                        |
| Small Intestine                                         | Small_Intestine                                        | GI_INTESTINE | PrimaryTissue   | O                        |
| Rectal Mucosa Donor 29                                  | Rectal_Mucosa_Donor_29                                 | GI_RECTUM    | PrimaryTissue   | O                        |
| Rectal Mucosa Donor 31                                  | Rectal_Mucosa_Donor_31                                 | GI_RECTUM    | PrimaryTissue   | O                        |
| Rectal Smooth Muscle                                    | Rectal_Smooth_Muscle                                   | GI_RECTUM    | PrimaryTissue   | O                        |
| Gastric                                                 | Gastric                                                | GI_STOMACH   | PrimaryTissue   | O                        |
| Stomach Mucosa                                          | Stomach_Mucosa                                         | GI_STOMACH   | PrimaryTissue   | O                        |
| Stomach Smooth Muscle                                   | Stomach_Smooth_Muscle                                  | GI_STOMACH   | PrimaryTissue   | O                        |
| Fetal Heart                                             | Fetal_Heart                                            | HEART        | PrimaryTissue   | O                        |
| Left Ventricle                                          | Left_Ventricle                                         | HEART        | PrimaryTissue   | O                        |
| Right Atrium                                            | Right_Atrium                                           | HEART        | PrimaryTissue   | O                        |
| Right Ventricle                                         | Right_Ventricle                                        | HEART        | PrimaryTissue   | O                        |
| iPS-20b Cell Line                                       | IPS-20b_Cell_Line                                      | IPSC         | CellLine        | O                        |
| iPS DF 6.9 Cell Line                                    | IPS_DF_6.9_Cell_Line                                   | IPSC         | CellLine        | O                        |
| iPS DF 19.11 Cell Line                                  | IPS_DF_19.11_Cell_Line                                 | IPSC         | CellLine        | O                        |
| iPS-15b Cell Line                                       | IPS-15b_Cell_Line                                      | IPSC         | CellLine        | O                        |
| iPS-18 Cell Line                                        | IPS-18_Cell_Line                                       | IPSC         | CellLine        | O                        |
| Fetal Kidney                                            | Fetal_Kidney                                           | KIDNEY       | PrimaryTissue   | O                        |
| Liver                                                   | Adult_Liver                                            | LIVER        | PrimaryTissue   | O                        |
| Psoas Muscle                                            | Psoas_Muscle                                           | MUSCLE       | PrimaryTissue   | O                        |
| Fetal Muscle Trunk                                      | Fetal_Muscle_Trunk                                     | MUSCLE       | PrimaryTissue   | O                        |
| HSMM Skeletal Muscle Myoblasts Cell Line                | HSMM_Skeletal_Muscle_Myoblasts                         | MUSCLE       | CellLine        | O                        |
| Muscle Satellite Cultured Cells                         | Muscle_Satellite_Cultured_Cells                        | MUSCLE       | PrimaryCell     | O                        |
| Skeletal Muscle Female                                  | Skeletal_Muscle_Female                                 | MUSCLE       | PrimaryTissue   | O                        |
| Skeletal Muscle Male                                    | Skeletal_Muscle_Male                                   | MUSCLE       | PrimaryTissue   | O                        |
| Fetal Muscle Leg                                        | Fetal_Muscle_Leg                                       | MUSCLE_LEG   | PrimaryTissue   | O                        |
| Ovary                                                   | Ovary                                                  | OVARY        | PrimaryTissue   | O                        |
| Pancreas                                                | Pancreas                                               | PANCREAS     | PrimaryTissue   | O                        |
| Pancreatic Islets                                       | Pancreatic_Islets                                      | PANCREAS     | PrimaryTissue   | O                        |
| Placenta                                                | Fetal_Placenta                                         | PLACENTA     | PrimaryTissue   | O                        |
| Placenta Amnion                                         | Placenta_Amnion                                        | PLACENTA     | PrimaryTissue   | O                        |
| NHDF-Ad Adult Dermal Fibroblast Primary Cells           | NHDF-Ad_Adult_Dermal_Fibroblasts                       | SKIN         | PrimaryCell     | O                        |
| NHEK-Epidermal Keratinocyte Primary Cells               | NHEK-Epidermal_Keratinocytes                           | SKIN         | PrimaryCell     | O                        |
| Foreskin Fibroblast Primary Cells skin01                | Penis_Foreskin_Fibroblast_Primary_Cells_skin01         | SKIN         | PrimaryCell     | O                        |
| Foreskin Fibroblast Primary Cells skin02                | Penis_Foreskin_Fibroblast_Primary_Cells_skin02         | SKIN         | PrimaryCell     | O                        |
| Foreskin Keratinocyte Primary Cells skin02              | Penis_Foreskin_Keratinocyte_Primary_Cells_skin02       | SKIN         | PrimaryCell     | O                        |
| Foreskin Keratinocyte Primary Cells skin03              | Penis_Foreskin_Keratinocyte_Primary_Cells_skin03       | SKIN         | PrimaryCell     | O                        |

|                                                                |                                                                            |                    |               |      |
|----------------------------------------------------------------|----------------------------------------------------------------------------|--------------------|---------------|------|
| Foreskin Melanocyte Primary Cells skin01                       | Penis_Foreskin_Melanocyte_Primary_Cells_skin01                             | SKIN               | PrimaryCell   | O    |
| Foreskin Melanocyte Primary Cells skin03                       | Penis_Foreskin_Melanocyte_Primary_Cells_skin03                             | SKIN               | PrimaryCell   | O    |
| Spleen                                                         | Spleen                                                                     | SPLEEN             | PrimaryTissue | O    |
| Bone Marrow Derived Cultured Mesenchymal Stem Cells            | Bone_Marrow_Derived_Mesenchymal_Stem_Cell_Cultured_Cells                   | STROMAL_CONNECTIVE | PrimaryCell   | O    |
| Mesenchymal Stem Cell Derived Chondrocyte Cultured Cells       | Chondrocytes_from_Bone_Marrow_Derived_Mesenchymal_Stem_Cell_Cultured_Cells | STROMAL_CONNECTIVE | PrimaryCell   | O    |
| Thymus                                                         | Thymus                                                                     | THYMUS             | PrimaryTissue | O    |
| Aorta                                                          | Aorta                                                                      | VASCULAR           | PrimaryTissue | O    |
| HUVEC Umbilical Vein Endothelial Primary Cells                 | HUVEC_Umbilical_Vein_Endothelial_Cells                                     | VASCULAR           | PrimaryCell   | O    |
| Primary Natural Killer cells from peripheral blood             | CD56_Primary_Cells                                                         | BLOOD              | PrimaryCell   | T    |
| Primary T CD8+ memory cells from peripheral blood              | CD8_Memory_Primary_Cells                                                   | BLOOD              | PrimaryCell   | T    |
| Primary T CD8+ naive cells from peripheral blood               | CD8_Naive_Primary_Cells                                                    | BLOOD              | PrimaryCell   | T    |
| Primary T cells effector/memory enriched from peripheral blood | CD4+_CD25int_CD127+_Tmem_Primary_Cells                                     | BLOOD              | PrimaryCell   | T    |
| Primary T cells from cord blood                                | CD3_Primary_Cells_Cord_BI                                                  | BLOOD              | PrimaryCell   | T    |
| Primary T cells from peripheral blood                          | CD3_Primary_Cells_Peripheral_UW                                            | BLOOD              | PrimaryCell   | T    |
| Primary T helper cells from peripheral blood                   | CD4+_CD25-_Th_Primary_Cells                                                | BLOOD              | PrimaryCell   | T    |
| Primary T helper cells PMA-I stimulated                        | CD4+_CD25-_IL17-_PMA-Ionomycin_stimulated_MACS_purified_Th_Primary_Cells   | BLOOD              | PrimaryCell   | T    |
| Primary T helper memory cells from peripheral blood 1          | CD4+_CD25-_CD45RO+_Memory_Primary_Cells                                    | BLOOD              | PrimaryCell   | T    |
| Primary T helper memory cells from peripheral blood 2          | CD4_Memory_Primary_Cells                                                   | BLOOD              | PrimaryCell   | T    |
| Primary T helper naive cells from peripheral blood             | CD4_Naive_Primary_Cells                                                    | BLOOD              | PrimaryCell   | T    |
| Primary T helper naive cells from peripheral blood             | CD4+_CD25-_CD45RA+_Naive_Primary_Cells                                     | BLOOD              | PrimaryCell   | T    |
| Primary T helper 17 cells PMA-I stimulated                     | CD4+_CD25-_IL17+_PMA-Ionomycin_stimulated_Th17_Primary_Cells               | BLOOD              | PrimaryCell   | Th17 |
| Primary T regulatory cells from peripheral blood               | CD4+_CD25+_CD127-_Treg_Primary_Cells                                       | BLOOD              | PrimaryCell   | Treg |

**Key**

|                                                 |                                                           |
|-------------------------------------------------|-----------------------------------------------------------|
| Standardized Epigenome name                     | Name of cell line                                         |
| Epigenome name (from EDACC Release 9 directory) | alias                                                     |
| ANATOMY                                         | cell type or tissue of procedence                         |
| TYPE                                            | primary or established cell line                          |
| Cell Bucket for Aanalysis                       | Major cell type associated to cell line for this analysis |
| B:                                              | B cells                                                   |
| T:                                              | T cells                                                   |
| M:                                              | Monocytes/macrophages                                     |
| O:                                              | Other                                                     |
| L:                                              | Lung                                                      |

Supplementary Table 6. Assignment of regulatory features into broad categories for this analysis

| Histone modification or variant | Putative functions                                                                                                                    |
|---------------------------------|---------------------------------------------------------------------------------------------------------------------------------------|
| H2az                            | Histone protein variant (H2A.Z) associated with regulatory elements with dynamic chromatin                                            |
| H3k4me1                         | Mark of regulatory elements associated with enhancers and other distal elements, but also enriched downstream of transcription starts |
| H3k04me1                        | Mark of regulatory elements associated with enhancers and other distal elements, but also enriched downstream of transcription starts |
| H3k4me2                         | Mark of regulatory elements associated with promoters and enhancers                                                                   |
| H3k04me2                        | Mark of regulatory elements associated with promoters and enhancers                                                                   |
| H3k4me2                         | Mark of regulatory elements associated with promoters and enhancers                                                                   |
| H3k04me2                        | Mark of regulatory elements associated with promoters and enhancers                                                                   |
| H3k4me3                         | Mark of regulatory elements primarily associated with promoters/transcription starts                                                  |
| H3k04me3                        | Mark of regulatory elements primarily associated with promoters/transcription starts                                                  |
| H3k04me3Ohtam                   | Mark of regulatory elements primarily associated with promoters/transcription starts                                                  |
| H3k9ac                          | Mark of active regulatory elements with preference for promoters                                                                      |
| H3k09ac                         | Mark of active regulatory elements with preference for promoters                                                                      |
| H3k9me1                         | Preference for the 5' end of genes                                                                                                    |
| H3k09me1                        | Preference for the 5' end of genes                                                                                                    |
| H3k9me3                         | Repressive mark associated with constitutive heterochromatin and repetitive elements                                                  |
| H3k09me3                        | Repressive mark associated with constitutive heterochromatin and repetitive elements                                                  |
| H3k27ac                         | Mark of active regulatory elements; may distinguish active enhancers and promoters from their inactive counterparts                   |
| H3k27ac                         | Mark of active regulatory elements; may distinguish active enhancers and promoters from their inactive counterparts                   |
| H3k27me3                        | Repressive mark established by polycomb complex activity associated with repressive domains and silent developmental genes            |
| H3k36me3                        | Elongation mark associated with transcribed portions of genes, with preference for 3' regions after intron 1                          |
| H3k79me2                        | Transcription-associated mark, with preference for 5' end of genes                                                                    |
| H4k20me1                        | Preference for 5' end of genes                                                                                                        |

Active TSS

Flanking Active TSS

Transcr. at gene 5' and 3'

Strong transcription

Weak transcription

Genic enhancers

Enhancers

ZNF genes & repeats

Heterochromatin

Bivalent/Poised TSS

Flanking Bivalent TSS/Enh

Bivalent Enhancer

Repressed PolyComb

Weak Repressed PolyComb

Quiescent/Low

Transcription/Elongation marker observed

Transcription/Elongation marker observed

Transcription/Elongation marker observed

ZNF genes harbor 3' repeats and have promoter and elongation markers. However, they don't seem to promote any gene activity tested.

Dead zone

Inactive Promoter

Inactive Enhancer

Inactive Enhancer

No/low marker activity

**Key**

|                                 |                                                                   |
|---------------------------------|-------------------------------------------------------------------|
| Histone modification or variant | Type of regulatory element or histone modification                |
| Putative functions              | predicted regulatory function                                     |
| Bucket_for_analysis             | Major regulatory function associated to element for this analysis |
